# Supplementary material for: The Genetic and Biochemical Basis of FANCD2 Monoubiquitination
Source: PubMed Central journal article supplement (PMC4051986; doi:10.1016/j.molcel.2014.05.001), 2014-06-05
Supplement: mmc2.pdf [file mmc2.pdf]

# The Genetic and Biochemical Basis of FANCD2 Monoubiquitination

Eeson Rajendra,<sup>1</sup> Vibe H. Oestergaard,<sup>1,3</sup> Frédéric Langevin,<sup>1</sup> Meng Wang,<sup>1,4</sup> Gillian L. Dornan,<sup>1</sup> Ketan J. Patel,<sup>1,2,\*</sup> and Lori A. Passmore<sup>1,\*</sup>

<sup>1</sup>MRC Laboratory of Molecular Biology, Francis Crick Avenue, Cambridge CB2 0QH, UK

<sup>2</sup>Department of Medicine, Level 5, Addenbrooke's Hospital, University of Cambridge, Cambridge CB2 0QQ, UK

<sup>3</sup>Present address: Department of Biology, University of Copenhagen, 2200 Copenhagen N, Denmark

<sup>4</sup>Present address: Department of Medicine, Level 5, Addenbrooke's Hospital, University of Cambridge, Cambridge CB2 0QQ, UK

\*Correspondence: [kjp@mrc-lmb.cam.ac.uk](mailto:kjp@mrc-lmb.cam.ac.uk) (K.J.P.), [passmore@mrc-lmb.cam.ac.uk](mailto:passmore@mrc-lmb.cam.ac.uk) (L.A.P.)

<http://dx.doi.org/10.1016/j.molcel.2014.05.001>

This is an open access article under the CC BY license (<http://creativecommons.org/licenses/by/3.0/>).

## SUMMARY

Fanconi anaemia (FA) is a cancer predisposition syndrome characterized by cellular sensitivity to DNA interstrand crosslinkers. The molecular defect in FA is an impaired DNA repair pathway. The critical event in activating this pathway is monoubiquitination of FANCD2. *In vivo*, a multisubunit FA core complex catalyzes this step, but its mechanism is unclear. Here, we report purification of a native avian FA core complex and biochemical reconstitution of FANCD2 monoubiquitination. This demonstrates that the catalytic FANCL E3 ligase subunit must be embedded within the complex for maximal activity and site specificity. We genetically and biochemically define a minimal subcomplex comprising just three proteins (FANCB, FANCL, and FAAP100) that functions as the monoubiquitination module. Residual FANCD2 monoubiquitination activity is retained in cells defective for other FA core complex subunits. This work describes the *in vitro* reconstitution and characterization of this multisubunit monoubiquitin E3 ligase, providing key insight into the conserved FA DNA repair pathway.

## INTRODUCTION

Fanconi anaemia (FA) is a rare, recessive disorder with a striking phenotype consisting of developmental defects, bone marrow failure, and cancer predisposition (Crossan and Patel, 2012). At the heart of FA are deficiencies in a network of proteins that constitute a conserved eukaryotic DNA repair pathway that targets DNA interstrand crosslinks and counteracts aldehyde genotoxicity (Kim and D'Andrea, 2012; Langevin et al., 2011). FA patients harbor inactivating mutations in any one of 15 *FANC* genes (Kottmann and Smogorzewska, 2013). In addition, five FA-associated proteins (FAAPs) play roles in the FA DNA repair pathway.

A number of *FANC* and FAAP proteins (FANCA, FANCB, FANCC, FANCE, FANCF, FANCG, FANCL, and FANCM and

FAAP20, FAAP24, and FAAP100) associate to form the FA core complex (Hodson and Walden, 2012; Meetei et al., 2003b). After DNA damage, this multisubunit E3 ligase carries out the specific monoubiquitination of FANCI and FANCD2, a critical event that initiates DNA repair (Garcia-Higuera et al., 2001; Knipscheer et al., 2009; Smogorzewska et al., 2007). The sites of monoubiquitination have been mapped to the conserved lysine 561 in human FANCD2 (K563 in chicken) and lysine 523 in human FANCI (K525 in chicken) (Garcia-Higuera et al., 2001; Ishiai et al., 2008; Matsushita et al., 2005; Sims et al., 2007; Smogorzewska et al., 2007). Ubiquitinated FANCD2 is a platform for the recruitment of additional proteins that coordinate DNA repair. These include the FAN1 nuclease and the scaffold protein FANCP (SLX4), which recruits the XPF-ERCC1, SLX1, and MUS81-EME1 nucleases (Cybulski and Howlett, 2011; Huang and D'Andrea, 2010).

Mechanistic insight into the FA core complex is lacking because it has yet to be purified in a form suitable for *in vitro* biochemical characterization. Challenges stem from the large number of subunits, their low abundance, and the absence of orthologs in lower eukaryotic model organisms such as yeast (Zhang et al., 2009). Other multisubunit E3 ligases, such as the anaphase-promoting complex/cyclosome (APC/C) and Skp-Cullin-F box (SCF) complex, function by precisely positioning substrate proteins for ubiquitination by their really interesting gene (RING) finger subunits (Zimmerman et al., 2010). Their complex architectures allow extensive regulation. The mechanism of the FA core complex is of particular interest because of its monoubiquitin ligase function (contrasting with either APC/C or SCF, which form polyubiquitin chains), its central position in the FA DNA repair pathway and its fundamental role in human health.

*In vitro* assays have been reconstituted with the FANCL RING finger subunit in the absence of other FA core complex subunits (Alpi et al., 2008; Longerich et al., 2009; Sato et al., 2012). RING finger E3 ligases are known to specifically recruit E2 ubiquitin-conjugating enzymes in order to allow ubiquitin transfer from E2 onto a substrate. Ubiquitin conjugating enzyme 2T (UBE2T) functions as an E2 enzyme for FANCL both *in vitro* and *in vivo* (Alpi et al., 2008, 2007; Hodson et al., 2014; Machida et al., 2006). A second E2 (UBE2W) binds FANCL and monoubiquitinates FANCD2 *in vitro* (Alpi et al., 2008; Zhang et al., 2011), but its role in the FA pathway has not been rigorously explored. Recent experiments have also revealed that efficient recognition

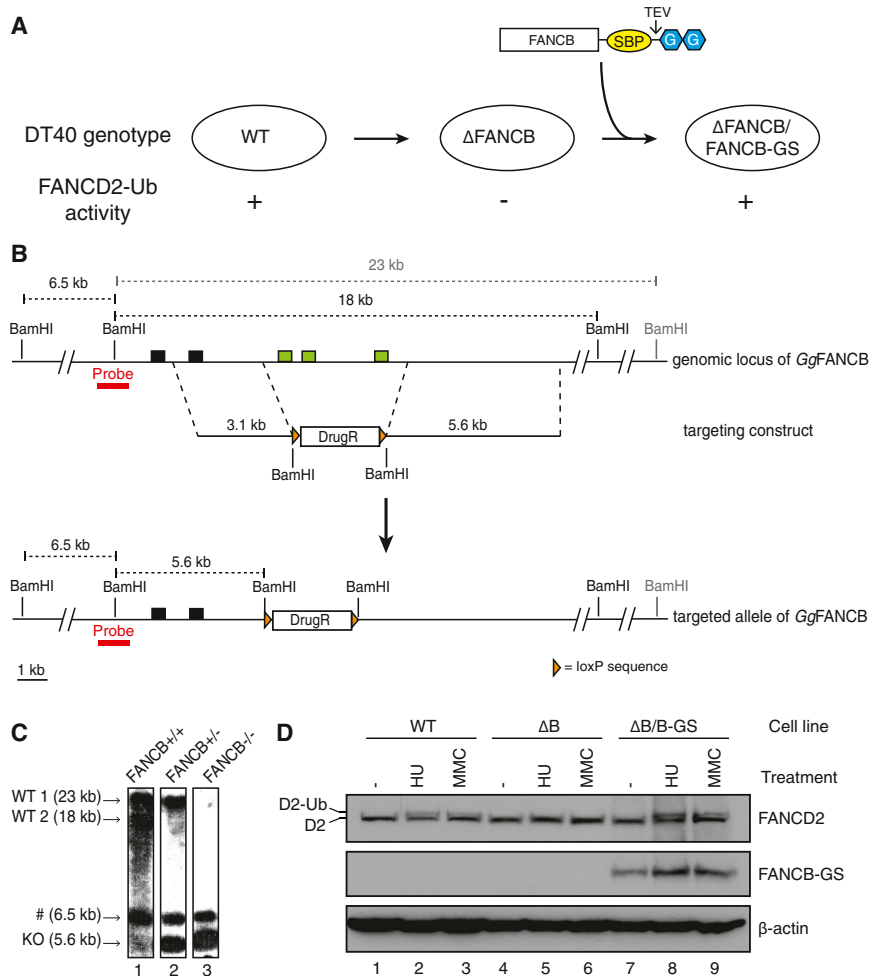

**Figure 1. Generation and Validation of the  $\Delta$ FANCB/FANCB-GS DT40 Cell Line**

(A) Schematic representation of generation of the  $\Delta$ FANCB/FANCB-GS cell line and the expected effect on FANCD2 monoubiquitination in vivo. G, the IgG binding domain of protein G; SBP, streptavidin binding peptide.

(B) Targeting strategy for the generation of the  $\Delta$ FANCB cell line. Exons are shown in black (exons 5 and 6) or green (exons 7, 8, and 9) boxes. The location of the Southern blot probe is in red. DrugR, drug resistance cassette.

(C) Southern blot showing gene targeting of FANCB. After BamHI digest, wild-type (WT) alleles are 23 or 18 kb, whereas the knockout allele (KO) is 5.6 kb. A 6.5 kb fragment (#) is present in all cell lines. Lane 1 shows a FANCB+/+ cell line, lane 2 shows FANCB+/-, and lane 3 shows FANCB-/-. (D)  $\Delta$ FANCB/FANCB-GS cells regained the ability to monoubiquitinate FANCD2 upon treatment with 1 mM hydroxyurea (HU) or 50 ng/ml mitomycin C (MMC). Western blotting of FANCD2 monoubiquitination in whole-cell extracts is shown for WT DT40 cells, cells with a deletion of the genomic FANCB gene ( $\Delta$ B), and  $\Delta$ B cells stably expressing chicken FANCB with a C-terminal protein G and streptavidin binding peptide tag ( $\Delta$ B/B-GS).

(D)  $\Delta$ FANCB/FANCB-GS cells regained the ability to monoubiquitinate FANCD2 upon treatment with 1 mM hydroxyurea (HU) or 50 ng/ml mitomycin C (MMC). Western blotting of FANCD2 monoubiquitination in whole-cell extracts is shown for WT DT40 cells, cells with a deletion of the genomic FANCB gene ( $\Delta$ B), and  $\Delta$ B cells stably expressing chicken FANCB with a C-terminal protein G and streptavidin binding peptide tag ( $\Delta$ B/B-GS).

of FANCD2 by FANCL in vitro depends on the presence of its binding partner FANCI and DNA (Sato et al., 2012). The roles of other FA subunits are poorly defined, and they largely lack any identifiable domains that could illuminate their function.

Here, we develop a purification strategy for isolating a native FA core complex. The recovered complex is efficient at FANCD2 monoubiquitination in a cell-free system, and our biochemical analysis points to a core subcomplex as being fundamental to this reaction. Finally, genetic ablation studies confirm an essential role for components of this minimal subcomplex in vivo.

## RESULTS

### Purification of a Native FA Core Complex

We developed a purification strategy to isolate the FA core complex from chicken DT40 cells, a vertebrate model used extensively in the study of the FA pathway (Niedzwiedz et al., 2004; Yamamoto et al., 2003). Our aim was to generate a cell line where the only copy of the FANCB subunit included an affinity purification tag (Figure 1A). First, we deleted the genomic copies of FANCB (Figures 1B and 1C). In wild-type cells, FANCD2 is monoubiquitinated after exposure to DNA damage or replication stress, for example, by the DNA crosslinking agent mitomycin C

or HU treatment (Figure 1D, lanes 2 and 3), which is in agreement with previous work in FA patient cells that lack functional FANCB (Meetei et al., 2004).

Next, FANCB with a C-terminal protein G-streptavidin binding peptide (GS) tag (Bürckstümmer et al., 2006) was used to complement the  $\Delta$ FANCB cells (Figure 1A).  $\Delta$ FANCB/FANCB-GS cells regained the ability to monoubiquitinate FANCD2 (Figure 1D, lanes 8 and 9). Thus, the tagged FANCB protein is functional and restores the activity of the FA core complex in vivo.

Using the  $\Delta$ FANCB/FANCB-GS DT40 cell line, we were able to purify the FA core complex with IgG agarose using elution by tobacco etch virus (TEV) cleavage and subsequent purification on streptavidin resin with biotin elution, as shown in Figure 2A. This yielded highly pure native FA core complex under physiological conditions. The purified complex contains nine known subunits whose identities were confirmed by western blotting and mass spectrometry: FANCA, FANCB, FANCC, FANCE, FANCF, FANCG, FANCL, FANCM, and FAAP100 (Figures 2B and 2C and data not shown). Quantitative SDS-PAGE analysis indicated that the subunits can be classified into three groups on the basis of their relative abundances: FANCB-FANCL-FAAP100 (B-L-100), FANCC-FANCE-FANCF (C-E-F), and

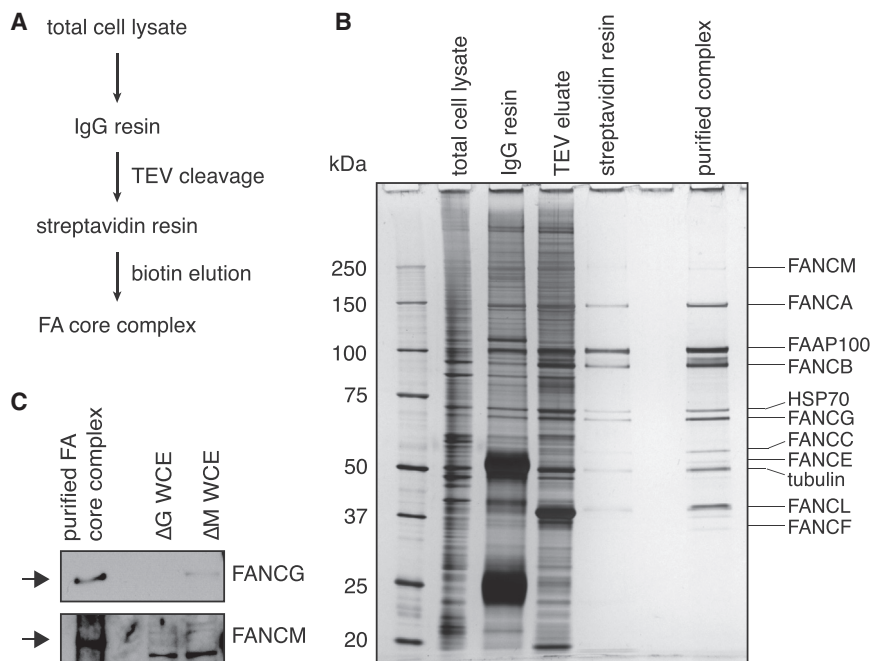

**Figure 2. Purification of the Fanconi Anaemia Core Complex**

(A) FA core complex purification strategy.

(B) SDS-PAGE and silver stain analysis of the purification of FA core complex from  $\Delta$ FANCB/FANCB-GS cells. Major species identified by mass spectrometry (data not shown) are indicated.

(C) The presence of FANCG and FANCM in purified FA core complex is confirmed by western blotting with antibodies against the endogenous proteins. The purified core complex was run on SDS-PAGE alongside whole-cell extracts (WCE) from  $\Delta$ FANCG and  $\Delta$ FANCM DT40 cells. See also Table S1.

FANCA-FANCG (A-G; Table S1 available online). The FANCM subunit is present in very low abundance, whereas its associated proteins (FAAP10, FAAP16, and FAAP24) and the FANCA-associated protein FAAP20 are not detected in our purification. These subunits are not essential for FANCD2 monoubiquitination or the structural integrity of the FA core complex in vivo but most likely facilitate chromatin localization (Kim et al., 2008; Mosedale et al., 2005; Singh et al., 2009, 2010; Yan et al., 2010). Thus, our purified FA core complex contains all subunits currently known to be required for FANCD2 monoubiquitination, demonstrating that a constitutively assembled core complex exists in asynchronous dividing cells independent of DNA damage (Alpi et al., 2007).

#### In Vitro FANCD2 Monoubiquitination by Purified FA Core Complex

The E3 ligase in the FA core complex is the RING-finger-containing FANCL subunit (Alpi et al., 2008; Cole et al., 2010; Meetei et al., 2003a). The roles of other subunits are unclear. In vivo mutation of any one of the core complex components is thought to abolish FANCD2 monoubiquitination and lead to defective DNA repair and disease (Garcia-Higuera et al., 2001). To investigate the biochemical activity of the FA core complex, we reconstituted its monoubiquitination activity in vitro. We incubated purified FA core complex with recombinant E1 ubiquitin-activating enzyme, UBE2T, HA-tagged ubiquitin, and the His-tagged substrates FANCD2 and FANCI (Figures 3A and S1A–S1C). To eliminate species incompatibilities, we used the chicken homologs of UBE2T, FANCD2, and FANCI. We monitored monoubiquitination of His-FANCD2 and His-FANCI by western blotting.

In this assay, our purified FA core complex catalyzes the transfer of ubiquitin onto FANCD2, as shown by the appearance of a discrete slower migrating band above FANCD2 on both anti-His and anti-HA western blots in Figures 3B and S1D (lanes 3 and 6).

The reaction goes to near completion at late time points, where unmodified FANCD2 is barely visible (Figure S1D, lane 6). Thus, our purified complex is active.

FANCD2 forms a complex in vivo with FANCI, and both are monoubiquitinated and recruited to sites of DNA damage in chromatin (Smogorzewska et al., 2007; Matsushita et al., 2005; Montes de Oca et al., 2005). We found that the in vitro activity of purified FA core complex is dependent on the presence of FANCI and is greatly stimulated by 5'-flapped DNA (Figure 3B), reflecting the in vivo context of its activity.

#### The Intact FA Core Complex Is More Active and More Specific than Isolated FANCL

As mentioned above, all previous in vitro studies of FANCD2 monoubiquitination had been performed with isolated FANCL (Alpi et al., 2008; Sato et al., 2012). We sought to compare this with the activity of our purified complex (Figures S1E and S1F).

Strikingly, the FA core complex is much more active than recombinant chicken FANCL (Figure 4). First, approximately five times more isolated FANCL is required to monoubiquitinate FANCD2 to the same level as FA core complex (Figure 4A, compare lanes 5 and 9; Figures S2A and S2B). Under these conditions, the FA core complex is also more specific, given that only isolated FANCL shows significant ubiquitin conjugation onto itself and UBE2T (Figure 4A, HA blot lanes 8 and 9). Second, when equimolar amounts of FA core complex and isolated FANCL are used in a time course of FANCD2 monoubiquitination, the rate of FANCD2 monoubiquitination is dramatically higher with FA core complex (Figures 4B, 4C, and S2C). Finally, FA core complex ubiquitinates FANCD2 on only the physiologically relevant lysine 563 (Figure 4D), whereas FANCL exhibits weak, but reproducible nonspecific, monoubiquitination of FANCD2<sup>K563R</sup> (see Figure S3A, lanes 23 and 35) (Sato et al., 2012). Cumulatively, these data show that the FA core complex is much more active and more specific than isolated FANCL.

Purified FA core complex catalyzes only the physiologically relevant formation of monoubiquitin linkages because a single discrete ubiquitinated FANCD2 species is observed (Figure 3).

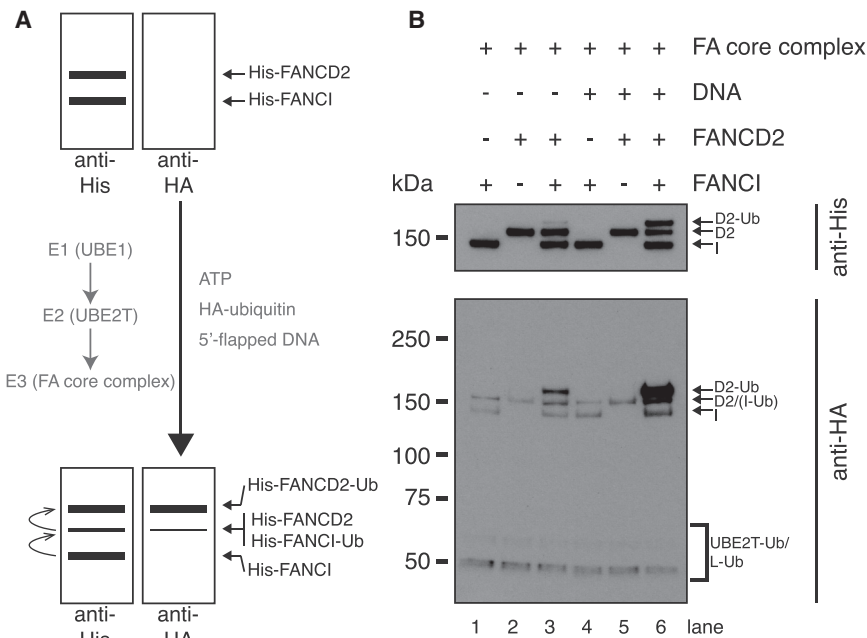

**Figure 3. Purified FA Core Complex Monoubiquitinates FANCD2 in the Context of FANCI and DNA**

(A) Schematic of the in vitro ubiquitination assay. Assays were monitored by western blotting with anti-His to detect His-tagged FANCI and FANCD2 or anti-HA to detect HA-tagged ubiquitin.

(B) Monoubiquitination of FANCD2 and the FANCI-FANCD2 complex in the absence or presence of 5'-flapped DNA after 90 min at 30°C. FANCI and FANCD2 show mild cross-reactivity with anti-HA. Autoubiquitination of FANCI and UBE2T are labeled. FA core complex concentration is ~200 nM. See Figure S1D for analysis after an additional 12 hr at room temperature. See also Figure S1.

### FANCI Is Not Ubiquitinated by a Purified FA Core Complex

FANCI monoubiquitination is presumed to be catalyzed by the FA core complex, but this modification is dispensable for DNA repair (Ishiai et al., 2008; Sims et al., 2007; Smogorzewska et al., 2007).

In contrast, reactions containing isolated FANCL demonstrate weak poly- or multiple monoubiquitination activity, seen as higher-molecular-weight smears on the gel (Figure S2A, HA blot lanes 8 and 9). Also unlike the FA core complex (Figure 3B, lanes 2 and 5), recombinant FANCL has FANCD2 monoubiquitination activity even in the absence of FANCI (see Figure S3A, HA blot lane 3) (Alpi et al., 2008; Sato et al., 2012). Altogether, these data suggest that other FA core complex subunits most likely contribute to activity, substrate recognition, and specificity required to retain exclusive monoubiquitination activity on FANCD2 in the context of FANCI.

### UBE2T, but Not UBE2W, Functions as a Specific E2 for FANCD2 Monoubiquitination In Vivo and In Vitro

Although UBE2T is established as an E2 for FANCD2 monoubiquitination in vivo (Alpi et al., 2007, 2008; Machida et al., 2006), UBE2W also binds FANCL (Alpi et al., 2008; Zhang et al., 2011). We found that, in assays with FANCL, UBE2W weakly monoubiquitinates FANCD2 and FANCI, but this was not dependent on the presence of the FANCI-FANCD2 complex (Figure S3A, lanes 4, 6, 10, and 12), stimulated by DNA (Figure S3A, lanes 6 and 12), and not site specific (Figure S3A, lanes 26 and 38). Similar observations were made in assays with the FA core complex (Figure S4B). These data indicate that UBE2W mediates nonspecific monoubiquitination of the FANCI-FANCD2 complex in vitro. To investigate its in vivo role, we deleted *UBE2W* in DT40 cells and examined FA pathway activity (Figures S3C and S3D).  $\Delta$ *UBE2W* cells did not display significant cellular sensitivity to MMC (Figure S3E) and had normal levels of basal and MMC-induced FANCD2 monoubiquitination, unlike  $\Delta$ *UBE2T* or  $\Delta$ *FANCB* cells (Figure S3F). Along with previous work (Alpi et al., 2007; Machida et al., 2006), our results emphatically show that UBE2W does not play a major role in site-specific monoubiquitination of FANCD2 and that UBE2T is the major E2 in the FA pathway.

We only observed weak FANCI monoubiquitination in our assay that was not affected by the presence of FANCD2 or DNA and did not significantly increase over time, suggesting that it may not be physiologically relevant (HA blots in Figures 3B, S1D, and S2). Therefore, the factors enhancing FANCI monoubiquitination remain elusive but could include an alternate chromatin and/or DNA context or interplay with ATR-dependent FANCI phosphorylation (Ishiai et al., 2008; Tomida et al., 2013).

### Purified FA Core Complex Lacking FANCC and FANCE Retains In Vitro Activity

FA can result from the loss of a single FA core complex subunit, which is thought to interfere with the integrity of the entire complex. To further investigate the stability and in vitro activity of the FA core complex, we deleted the *FANCC* gene (Niedzwiedz et al., 2004) in  $\Delta$ *FANCB*/*FANCB*-GS cells. Cellular fractionation before and after *FANCC* deletion revealed that although FANCD2 monoubiquitination was significantly impaired, a residual amount was detectable in the chromatin-bound fraction after MMC treatment (Figure 5A, lane 8). This suggested that even with the loss of *FANCC*, the FA complex remains partially competent for FANCD2 monoubiquitination in vivo. To verify this, we purified the FA core complex from the  $\Delta$ *FANCC*/ $\Delta$ *FANCB*/*FANCB*-GS cell line. This yielded a preparation specifically lacking the deleted *FANCC* gene product and its known binding partner FANCE (Figure 5B) (Pace et al., 2002; Taniguchi and D'Andrea, 2002). FANCF, thought to bridge the FANCC-FANCE and FANCA-FANCG subunits (Léveillé et al., 2004), was also depleted. Thus, although *FANCC* deletion partially destabilized the complex through loss of FANCE and FANCF, the remaining subunits (FANCA, FANCB, FANCG, FANCL, and FAAP100) were stably associated and the yield of purified complex was similar to wild-type cells.



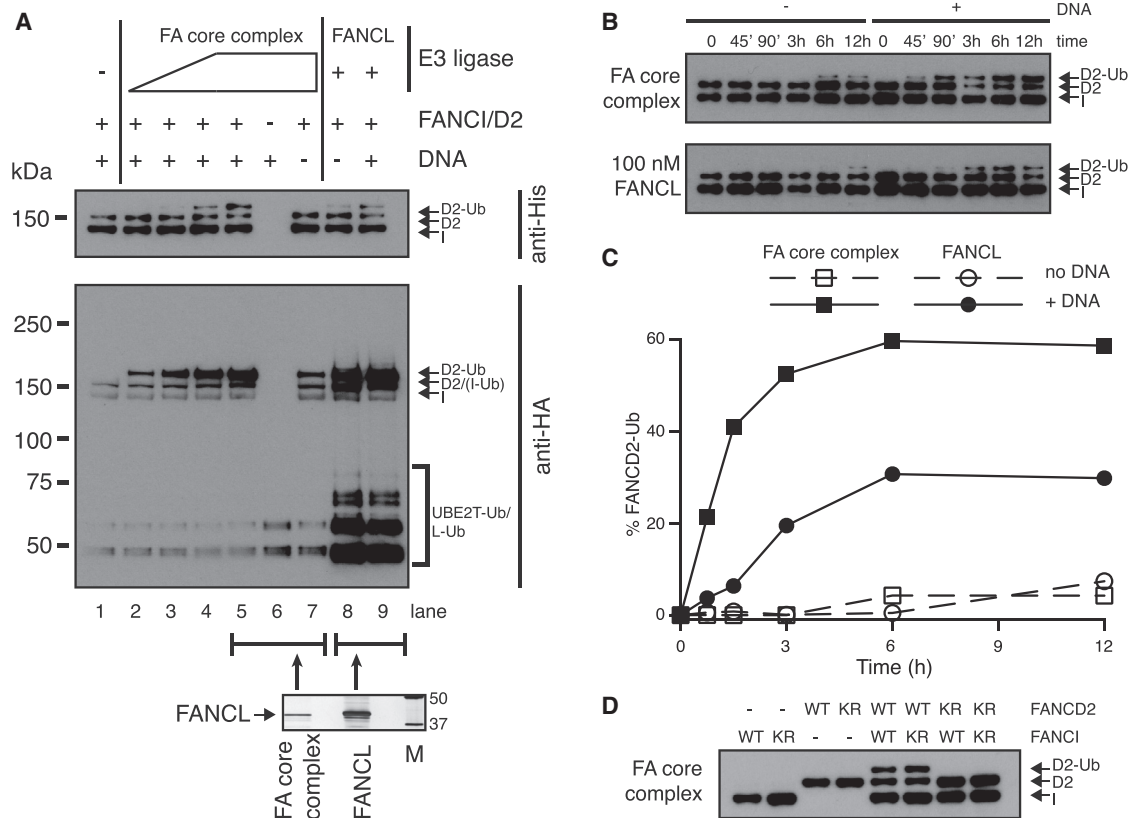

**Figure 4. The FA Core Complex Has Higher Activity and Specificity than Isolated FANCL**

(A) Titration of the FA core complex in a 2-fold dilution series (lanes 2–5) is compared to isolated FANCL (lanes 8 and 9) in the monoubiquitination assay after 90 min at 30°C monitored by western blotting. See Figure S2A for analysis after an additional 12 hr at room temperature. The bottom panel is a silver-stained gel showing the relative amounts of isolated FANCL (1 μM) used for the reactions in lanes 8 and 9 and FANCL in the FA core complex (~200 nM) at the highest concentration in lanes 5–7. The full gel is shown in Figure S2B.

(B) Time course of FANCD2 monoubiquitination by the FA core complex (top) and a molar equivalent amount of recombinant FANCL (bottom). Anti-His western blots for detecting His-tagged FANCI and FANCD2 are shown. Anti-HA western blots of the same samples to detect HA-ubiquitin are shown in Figure S2C.

(C) The amounts of FANCD2-Ub in the reactions shown in (B) were quantified and are plotted as a percentage of total FANCD2 (ubiquitinated FANCD2/total FANCD2).

(D) Monoubiquitination of WT and nonubiquitinatable (lysine to arginine, KR) mutants of FANCI and FANCD2 by ~100 nM core complex in the presence of DNA over 3 hr at 30°C.

See also Figures S2 and S3.

Surprisingly, when we assayed the FA core complex lacking FANCC and FANCE, FANCD2 monoubiquitination activity was comparable to the wild-type complex (Figure 5C). There was no discernable difference in the rate of monoubiquitination, the effect of DNA, or the lack of FANCI monoubiquitination. These data demonstrate that the FANCC-FANCE subcomplex is dispensable for the overall stability and catalytic activity of the FA core complex.

#### Residual In Vivo FANCD2 Monoubiquitination Activity after Deletion of FANCA, FANCC, FANCF, or FANCG but Not FANCB, FANCL, or FAAP100

We were surprised that purified FA core complex lacking FANCC and FANCE (and with substantially reduced FANCF) had normal activity in vitro. To understand the roles of other core complex subunits, we took further advantage of the genetic tractability of the DT40 system. Specifically, we examined FANCD2 ubiquitination in vivo in a panel of DT40 cell lines in which each individual FA core complex subunit, with the exception of FANCE, had been deleted. Although very weak in comparison to wild-type or ΔFANCM cells, residual chromatin-associated FANCD2 monoubiquitination is still present in cells lacking FANCA, FANCC, FANCF, or FANCG (Figure 5D, bottom two panels). This is an unexpected result, given that work on human FA patient-derived lymphocytes shows an absence of FANCD2 monoubiquitination in all of the FA core complex complementation groups except FANCM (Garcia-Higuera et al., 2001; Singh et al., 2009).

In contrast, cells lacking FANCB, FANCL, or FAAP100 completely lost the ability to ubiquitinate FANCD2 (Figure 5D). This is consistent with FANCL's role as the E3 ligase and the direct interaction of these three subunits (Ling et al., 2007). This surprising result demonstrates that, at least in DT40 cells, FANCB, FANCL, and FAAP100 are the only subunits whose deletion results in complete loss of FANCD2 monoubiquitination. To further

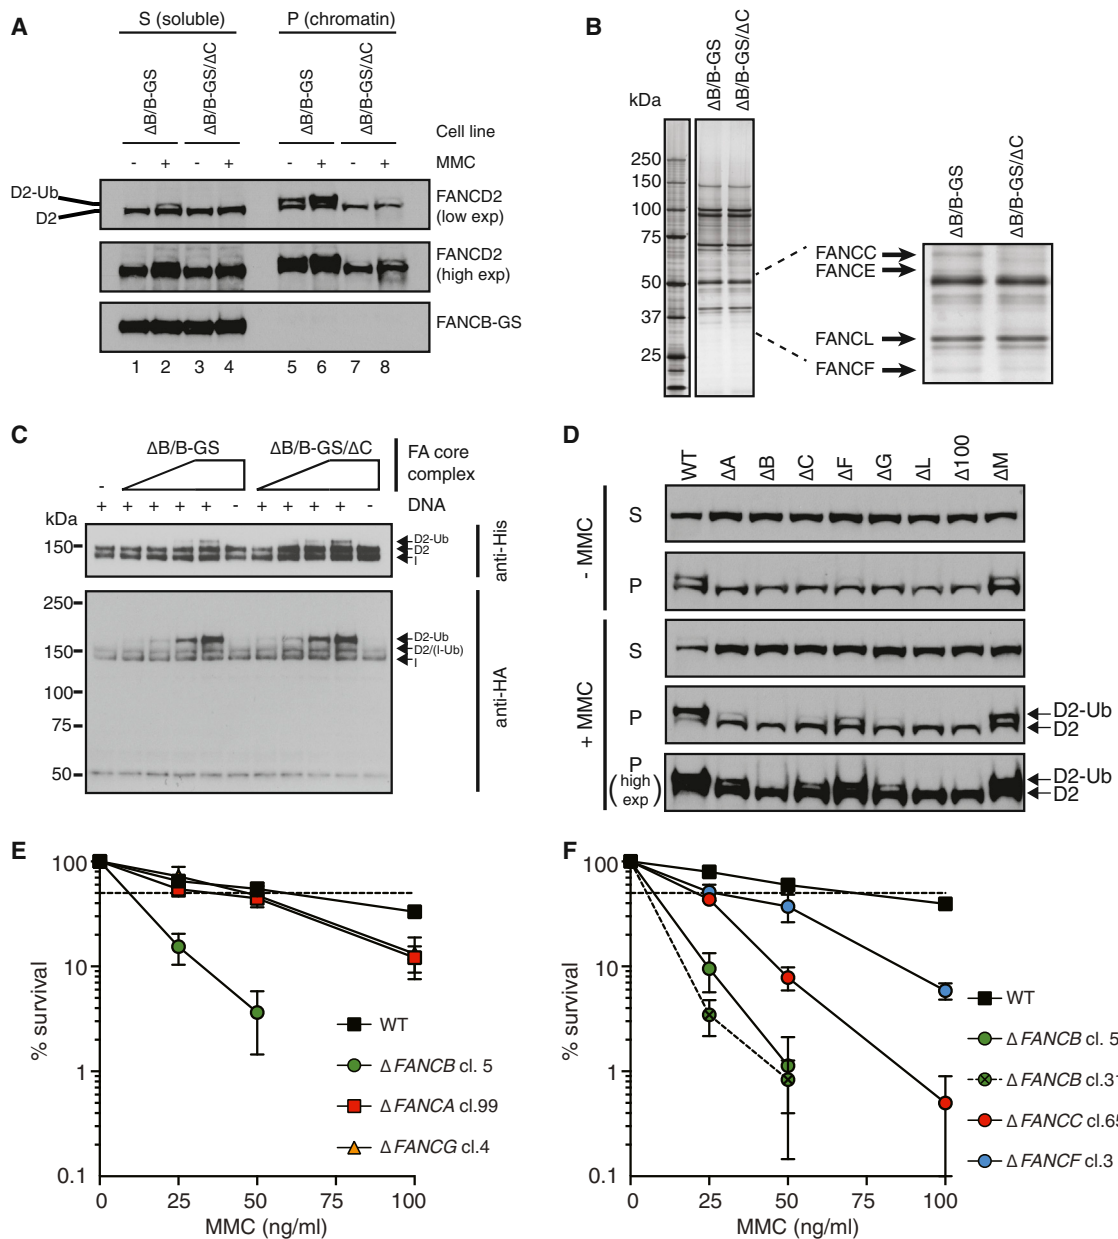

**Figure 5. Deletion of FANCC Does Not Impact the In Vitro Ubiquitin Ligase Activity of the FA Core Complex, and the FANCB-FANCL-FAAP100 Subcomplex Is Essential for Monoubiquitination In Vivo**

(A) Western blots of  $\Delta FANCB/FANCB-GS$  ( $\Delta B/B-GS$ ) and  $\Delta FANCB/FANCB-GS/\Delta FANCC$  ( $\Delta B/B-GS/\Delta C$ ) cells (with and without MMC treatment) after subcellular fractionation into cytoplasmic (S) and chromatin (P) fractions with anti-FANCD2. Low and high exposures are shown.

(B) SDS-PAGE and silver stain analysis of the FA core complex purified from  $\Delta B/B-GS$  and  $\Delta B/B-GS/\Delta C$  cell lines in parallel. The inset shows loss of FANCC and FANCE proteins and reduction of FANCF.

(C) In vitro ubiquitination assays of the FA core complexes (~80 nM) shown in (B) monitored by western blotting against FANCD2 and FANCI (anti-His) and ubiquitin (anti-HA).

(D) DT40 cell lines with FA core complex subunit deletions were treated with MMC, fractionated into cytoplasmic (S) and chromatin (P) fractions and subjected to western blotting with anti-FANCD2. An additional high exposure is shown for the bottom panel.

(E and F) Cellular sensitivity of WT,  $\Delta FANCA$ ,  $\Delta FANCG$ ,  $\Delta FANCB$ ,  $\Delta FANCC$ , and  $\Delta FANCF$  DT40 cells after exposure to indicated doses of MMC. The mean percentage of survival  $\pm$  SEM of three independent colony-formation assays are plotted relative to untreated cells.  $\Delta FANCB$  cl. 31 is the unloxped parental line to  $\Delta FANCB$  cl. 5.

See also Figure S4.

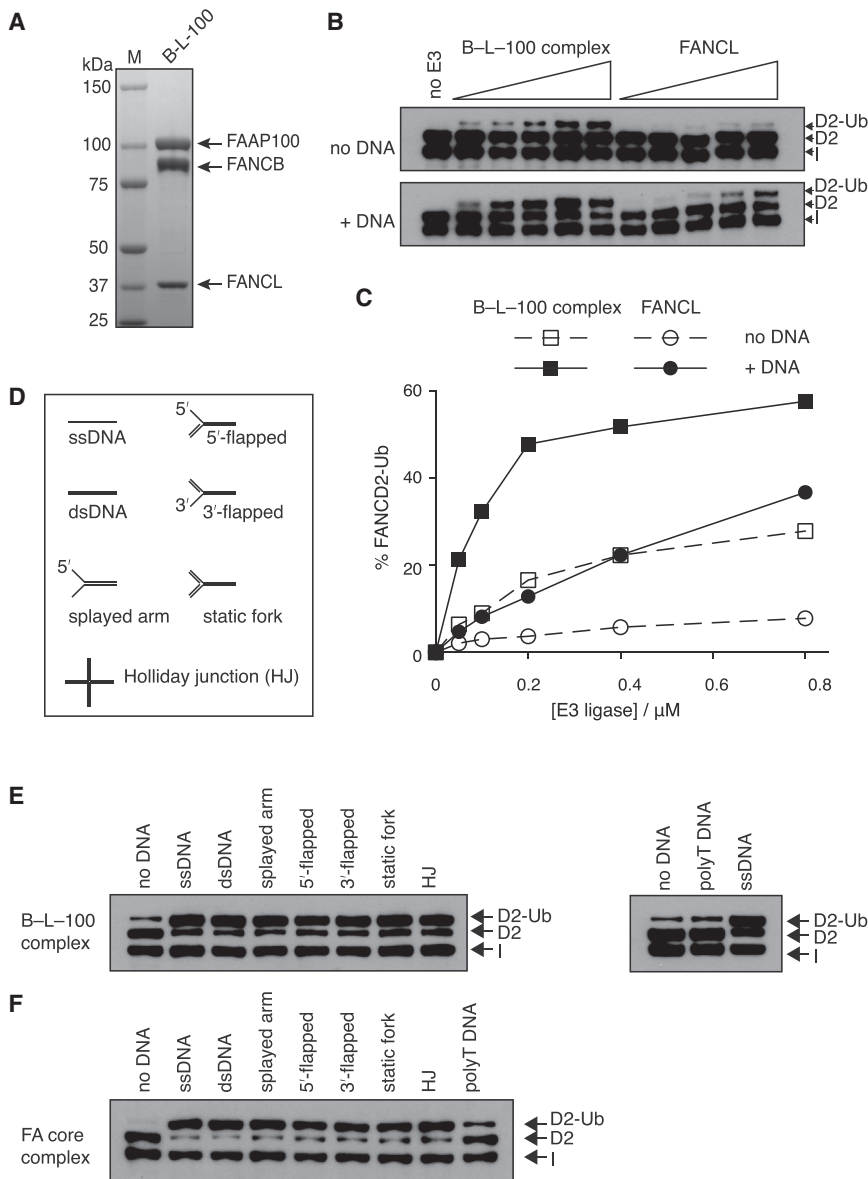

**Figure 6. In Vitro FANCD2 Monoubiquitination by the B-L-100 Subcomplex**

(A) Coomassie Blue SDS-PAGE analysis of purified chicken recombinant B-L-100.

(B) FANCD2 monoubiquitination by the B-L-100 subcomplex and isolated FANCL in 2-fold dilution series starting at 0.8  $\mu$ M in the absence and presence of DNA analyzed by western blotting with anti-His.

(C) The amounts of FANCD2-Ub in the reactions shown in (B) were quantified and plotted as a percentage of total FANCD2 (ubiquitinated FANCD2/ total FANCD2).

(D) Schematic of different DNA substrates. ss, single-stranded; ds, double-stranded.

(E and F) FANCD2 monoubiquitination by the B-L-100 subcomplex (E) or FA core complex (F) in the presence of 1  $\mu$ M DNA substrates indicated in (D). Reactions were performed for 90 min with 200 nM B-L-100 or FA core complex. Right, a comparison between 49-mer ssDNA and polyT DNA. See also Figure S5.

certain FA core complex subunit knockout cells (Figure 5D) would be expected to show attenuated cellular sensitivity to DNA damage in comparison to knockout cells with no FANCD2 ubiquitination. To test this, we exposed DT40 cells to MMC and determined their survival. As shown in Figures 5E and 5F,  $\Delta$ FANCB cells are more sensitive to MMC than  $\Delta$ FANCA,  $\Delta$ FANCG,  $\Delta$ FANCC, and  $\Delta$ FANCF cells. Thus, the amount of FANCD2 monoubiquitination correlates with MMC sensitivity in cells.

### Recombinant B-L-100 Monoubiquitinates FANCD2

FANCC and FANCE are biochemically dispensable for FANCD2 ubiquitination by a purified FA core complex (Figure 5C), and only FANCB, FANCL, and FAAP100

are genetically essential *in vivo* for monoubiquitination (Figure 5D). Therefore, we reasoned that FANCB, FANCL, and FAAP100 could constitute the catalytic core of the FA core complex. We expressed and purified a complex of B-L-100 (Figure 6A). *In vitro* reconstitution assays show that B-L-100 is more active than FANCL alone (Figures 6B and 6C). In the presence of DNA, the B-L-100 subcomplex is 5- to 6-fold more active at ubiquitinating FANCD2 than isolated FANCL and thus comparable with the intact core complex. However, unlike the intact core complex, weak FANCD2 ubiquitination in the absence of FANCI (Figure S5A) and very weak multiple ubiquitination could be observed (Figure S5B).

Interestingly, the B-L-100 subcomplex retained significant activity in the absence of DNA (compare Figures 4C and 6C). To gain insight into the mechanism of DNA stimulation, we tested a panel of DNAs with different structures for their abilities to

establish that this striking finding is broadly applicable to the mammalian FA pathway, we examined FANCD2 monoubiquitination in mammalian cell lines (human, mouse, and hamster) with targeted disruption of a FA subunit and compared this to isogenic wild-type cell lines. Chromatin-bound FANCD2 from cells with targeted disruption of *FANCG*, but not *FANCB*, retains residual FANCD2 ubiquitination (Figure S4). Furthermore, residual FANCD2 monoubiquitination has recently been demonstrated in a panel of human cell lines with targeted disruption of FA core complex subunits with the exception of  $\Delta$ FANCB,  $\Delta$ FANCL, or  $\Delta$ FAAP100, which have no monoubiquitination activity (Huang et al., 2014).

Ubiquitinated FANCD2 is thought to act as an adaptor for DNA repair enzymes, allowing incision at sites of DNA crosslinks and promoting repair by homologous recombination (Crossan and Patel, 2012). Therefore, residual FANCD2 ubiquitination in

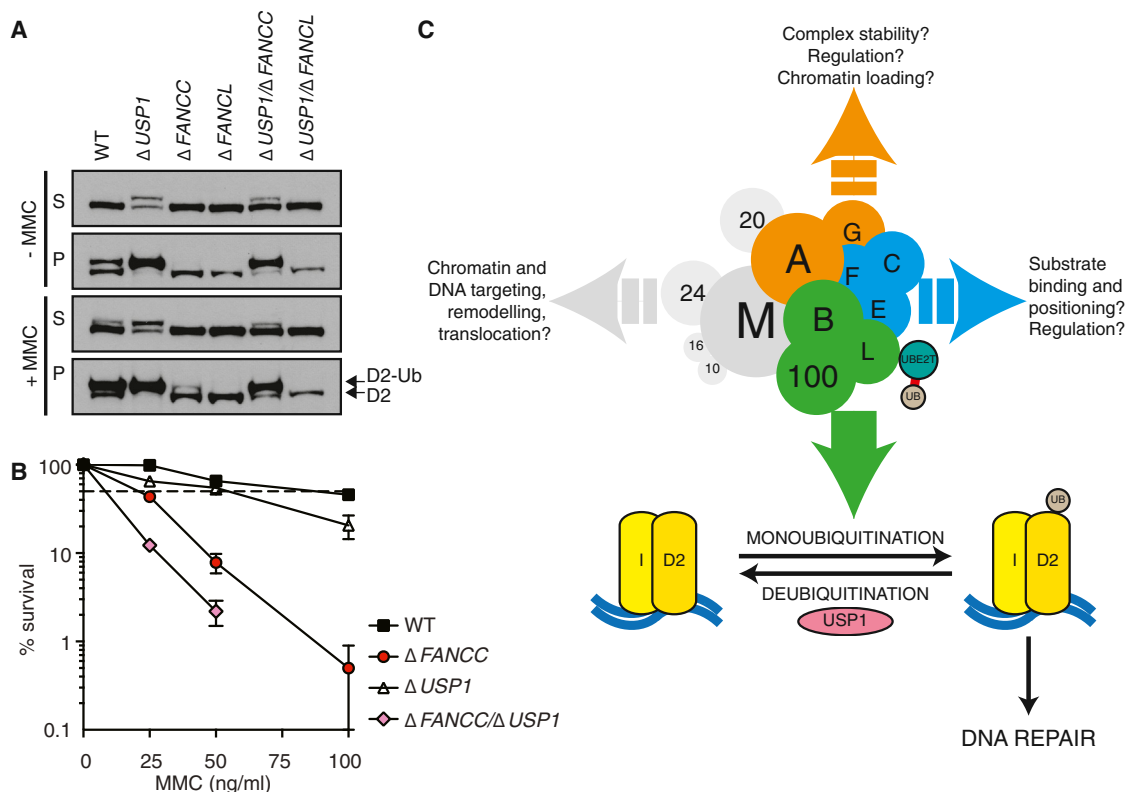

**Figure 7. USP1 Deletion Restores FANCD2 Monoubiquitination but Not Sensitivity to MMC in  $\Delta$ FANCC Cells**

(A) DT40 cell lines with indicated genotypes were treated with MMC, fractionated into cytonucleoplasmic (S) and chromatin (P) fractions, and analyzed by western blotting with anti-FANCD2.

(B) Cellular sensitivity of DT40 cells after exposure to indicated doses of MMC. The mean percentage of survival  $\pm$  SEM of three independent colony-formation assays are plotted relative to untreated cells.

(C) The FA core complex is comprised of multiple modules. B-L-100 (green) is central to the monoubiquitination step. The A-G (orange) and C-E-F (blue) modules may affect this catalytic function through regulatory or stabilizing roles. They may also serve distinct functions independent of ubiquitination in FA DNA repair. Subunits shown to be dispensable for ubiquitination in vivo are in gray.

See also Figure S6.

stimulate FANCD2 monoubiquitination. A variety of different DNA substrates stimulated the reaction (Figures 6D–6F and S5C). Intriguingly, unstructured polyT DNA did not stimulate the activity of B-L-100 or the intact core complex to the same extent as other DNAs (Figures 6E and 6F). In comparison to B-L-100, the intact core complex has lower basal FANCD2 monoubiquitination activity in the absence of DNA. This suggests DNA may be required to activate the FA core complex.

#### USP1 Deletion Permits Accumulation of FANCD2 Monoubiquitination in Cells with Residual Activity

The deubiquitinase enzyme USP1, in complex with UAF1, has been shown to deubiquitinate FANCD2 (Nijman et al., 2005). USP1 disruption leads to constitutive, chromatin-targeted monoubiquitinated FANCD2 (Kim et al., 2009; Oestergaard et al., 2007). To understand the functional importance of weak residual FANCD2 ubiquitination found in a FA-core-complex-defective cell line, we targeted both *USP1* and *FANCC* in DT40 cells (Figure S6A). Strikingly, FANCD2 monoubiquitination was restored in the double mutant, supporting the observation of a partially active core complex in  $\Delta$ FANCC cells (Figures 7A,

S6B, S6D, and S6E). However, ubiquitination was not induced upon DNA damage, and monoubiquitinated FANCD2 was largely chromatin bound, though it was not as heavily enriched on chromatin as in  $\Delta$ USP1 cells (Oestergaard et al., 2007). Another target of USP1 activity, PCNA, was not affected in the double mutant (Figures S6B and S6C). As previously reported (Oestergaard et al., 2007), a  $\Delta$ USP1/ $\Delta$ FANCL mutant showed no rescue of FANCD2 ubiquitination, given that the catalytic activity of the core complex was fully compromised (Figure 7A).

Although monoubiquitinated FANCD2 was present in  $\Delta$ USP1/ $\Delta$ FANCC cells, the double mutant was more sensitive to MMC than either single mutant (Figure 7B). In comparison, we have previously shown that  $\Delta$ USP1/ $\Delta$ FANCL cells are not more sensitive to DNA damage than the *FANCL* mutant alone (Oestergaard et al., 2007). Altogether, these results support the notion of epistasis between the gene products essential for monoubiquitination (FANCB, FANCL, and FAAP100) and deubiquitination (USP1) events in crosslink repair. Even though the residual FANCD2 ubiquitination in  $\Delta$ FANCC cells is sufficient to partially attenuate MMC sensitivity in comparison to  $\Delta$ FANCB cells that entirely lack ubiquitination (Figure 5F), simply restoring the



ubiquitinated FANCD2 (by deleting  $\Delta USP1$ ) in this context is not sufficient to restore a functional FA DNA repair response.

## DISCUSSION

In this study, we have combined a stringent biochemical purification strategy with genetic analyses in DT40 cells to establish a system for mechanistic interrogation of the FA pathway. We report the purification of a native FA core complex and the reconstitution of its FANCD2 monoubiquitination activity *in vitro*. The intact complex is more active and specific than the FANCL subunit alone. Within the intact complex, we identify a minimal subcomplex of just three subunits (B-L-100) that constitutes the essential machinery required for robust FANCD2 ubiquitination (Figure 7C). Understanding how FANCB and FAAP100 enhance the activity of FANCL in this subcomplex will be an important direction for future study. They may stabilize the FANCL protein or support a conformation permissive for binding to both UBE2T and FANCD2 in order to enhance substrate recognition, positioning, and modification.

Surprisingly, even though mutation in any subunit was thought to destabilize and inactivate the FA core complex in patients, not all subunits are required for monoubiquitination. We verified the catalytic competence of FA core complex lacking FANCC with both *in vivo* (Figures 5A, 5D, and 7A) and *in vitro* (Figure 5C) methods. The reduced level of *in vivo* ubiquitination in  $\Delta FANCC$  cells may result from inefficient regulation, subcellular localization, or unproductive substrate binding (Gordon et al., 2005; Pace et al., 2002). It is possible that FANCC and other core complex subunits directly regulate the monoubiquitination reaction (positively or negatively), help recruit and/or position substrates, or indirectly control the catalytic activity *in vivo* through stability and/or localization of the FA core complex. Alternatively, given that a mutation in any single core complex component (not just FANCB, FANCL, or FAAP100) manifests in FA, the core complex or its subcomplexes could have additional roles in DNA repair independent of ubiquitination (Matsushita et al., 2005). Nevertheless, our work provides clear evidence that the B-L-100 subcomplex is the monoubiquitination module because DT40 cells that have a deletion of any other subunit retain residual FANCD2 monoubiquitination. To date, residual FANCD2 monoubiquitination has not been detected in FA patient-derived cell lines, although it is observed in gene-targeted mammalian cells (Figure S4).

A number of different DNA structures stimulate the *in vitro* ubiquitination of FANCD2. This is not unexpected for two reasons. First, the FA pathway is activated *in vivo* by a diverse range of DNA-damaging and replication-stress-inducing agents that are likely to elicit different DNA conformations, structures, and adducts (Garcia-Higuera et al., 2001; Howlett et al., 2005). Second, studies in *Xenopus* egg extracts reveal that an array of exogenous DNA substrates can induce FANCI/FANCD2 monoubiquitination (Räschle et al., 2008; Sareen et al., 2012; Sobek et al., 2007). Given that unstructured polyT had a reduced effect, structured and/or duplex DNA may be required to promote a conformational change that makes the K563 acceptor lysine in FANCD2 accessible. This may be mediated by FANCI, which is known to bind FANCD2 and structured DNA substrates (Joo

et al., 2011; Longerich et al., 2009; Sato et al., 2012; Yuan et al., 2009).

Although our purification shows that the intact complex exists and can be purified, independent of induced DNA damage (Figure 2B) (Alpi et al., 2007), the subunits were present in nonuniform amounts (Table S1) and could be grouped based on their relative abundances: B-L-100, C-E-F, and A-G (Figure 7C). The existence of FA subcomplexes is consistent with earlier work (Garcia-Higuera et al., 2001, 2000; Ling et al., 2007; Medhurst et al., 2006; Thomashevski et al., 2004) and could represent different stoichiometries within the assembled complex, assembly intermediates, and/or functional modules. For example, although FANCL has been shown to directly bind FANCD2 and FANCI (Cole et al., 2010; Hodson et al., 2011; Seki et al., 2007), C-E-F could represent a functional module that regulates these substrate interactions via FANCE-FANCD2 associations or impinges upon substrate accessibility by USP1 (Gordon et al., 2005; Nookala et al., 2007; Pace et al., 2002; Polito et al., 2014).

FANCF could act as a scaffold to anchor both the A-G module (Léveillé et al., 2004) and the FANCM-FAAP24-FAAP10-FAAP16 module implicated in chromatin targeting, suppression of crossover recombination, and checkpoint signaling (Collis et al., 2008; Deans and West, 2009; Rosado et al., 2009). The A-G module may also function in chromatin targeting of the complex suggested by data showing intrinsic DNA binding of FANCA (Yuan et al., 2012) and the association of FANCA with FAAP20, a ubiquitin-binding-zinc-finger-containing protein that binds ubiquitin chains assembled by RNF8 and promotes chromatin targeting of the core complex and FANCD2 *in vivo* (Ali et al., 2012; Leung et al., 2012; Yan et al., 2012).

Our finding that combined *USP1* and *FANCC* deletion restores monoubiquitinated FANCD2 but cannot rescue MMC sensitivity challenges the broadly held view of a linear FA pathway in which substrate ubiquitination by the FA core complex alone leads to DNA repair. The ubiquitinated FANCD2 in  $\Delta USP1/\Delta FANCC$  cells, although near wild-type levels, is substantially chromatin bound and not induced by DNA damage. Clearly, the ubiquitination and deubiquitination of FANCD2 must be a tightly regulated response in a functional FA pathway. That  $\Delta USP1/\Delta FANCC$  cells are more sensitive than either single mutant suggest that the FA core complex may serve other functions in DNA repair in addition to ubiquitination. Elucidating these functions may ultimately explain why the FA core complex has such a highly conserved yet poorly understood macromolecular composition.

Our work establishes a comprehensive genetic, biochemical, and structural framework to dissect the mechanism of monoubiquitination by the FA core complex. Using this system, it may now be possible to interrogate the activity of the complex from different physiological states, different subcellular locations, in response to cell-cycle progression and, critically, in response to DNA damage when the FA pathway is activated.

## EXPERIMENTAL PROCEDURES

Detailed purification protocols and generation of cell lines are described in the Supplemental Information. The tandem affinity purification scheme is modified from Bürckstümmer et al. (2006) and was performed at 4°C. In brief, to purify a

FA core complex,  $\Delta B/B$ -GS, or  $\Delta B/B$ -GS/ $\Delta C$  DT40 cells were lysed in GS buffer (50 mM HEPES [pH 8.0], 150 mM NaCl, 5% glycerol, 0.1% Igepal CA-630, 1.5 mM  $MgCl_2$ , 25 mM NaF, 2 mM  $Na_3VO_4$ , 40 mM  $\beta$ -glycerophosphate, 1 mM phenylmethylsulfonyl fluoride, 10 mM  $\beta$ -mercaptoethanol [BME], and PhosSTOP inhibitor cocktail [Roche] and protease inhibitor cocktail) by passing through 19 G and 25 G needles multiple times. After clarification, the lysate was incubated with IgG-agarose beads (Sigma-Aldrich) for 2 hr with gentle rotation. The beads were washed with wash buffer (50 mM HEPES [pH 8.0], 150 mM NaCl, 10% glycerol, and phosphatase/protease inhibitors) and then wash buffer supplemented with 5 mM BME. To elute, the beads were incubated with TEV protease at 16°C for 2 hr with gentle agitation. For the second affinity step, the supernatant was incubated with Ultralink Streptavidin Plus Resin (Pierce) with gentle rotation for 1 hr, washed with 100 bed volumes of wash buffer supplemented with 5 mM BME, and eluted with wash buffer supplemented with 3 mM BME and 6 mM D-biotin (Sigma-Aldrich). The complex was resolved by SDS-PAGE and analyzed by Coomassie, silver (Sigma-Aldrich), or SYPRO-Ruby (Lonza) staining. Bands were excised, digested, and identified by tandem mass spectrometry (data not shown) with multiple independent purifications. The major species identified in each band is indicated in Figure 2B. Purified complex was used fresh, immediately after purification, for downstream biochemical analyses. A titration against known concentrations of recombinant FANCL was used to approximate the concentration of prepared FA core complex (normalized to its FANCL band) on SDS-PAGE. We estimate that, from a  $\sim 3$  g DT40 cell pellet (2–4 L cell culture), we purified  $\sim 5$   $\mu$ g FA core complex.

Western blotting was performed after SDS-PAGE on 4%–12% Bis-Tris gels or 3%–8% Tris-Acetate gels (Life Technologies) and transfer to polyvinylidene fluoride membranes (Millipore). The antibodies used were HRP-conjugated anti-HA (F-7, Santa Cruz Biotechnology), HRP-conjugated anti-His (H-3, SCBT), anti- $\beta$ -actin (AC-15, Sigma-Aldrich), anti-chicken FANCG (Alpi et al., 2007), anti-chicken FANCM (Mosedale et al., 2005), or anti-chicken FANCD2 (gift of Michael Hodkinson, Medical Research Council Laboratory of Molecular Biology).

For ubiquitination assays, reactions in 10–20  $\mu$ l volumes were performed in a buffer comprising 50 mM HEPES (pH 7.5), 64 mM NaCl, 4% glycerol, 5 mM  $MgCl_2$ , 2 mM ATP, and 0.5 mM dithiothreitol. In all reactions, 75 nM E1 (Boston Biochem) and 1  $\mu$ M E2 (UBE2T or UBE2W) enzymes, 1  $\mu$ M substrate (FANCI, FANCI<sup>K525R</sup>, FANCD2, and FANCD2<sup>K563R</sup>), 50  $\mu$ M 5'-flapped DNA (nucleotide concentration, unless otherwise stated), and 20  $\mu$ M HA-ubiquitin (Boston Biochem) were used unless otherwise stated. E3 (FANCL or FA core complex) concentrations are indicated in the figures. Optimal E2 and FANCL concentrations were determined by titrations. All reactions were incubated at 30°C for 90 min (or for indicated times as part of a time course) and quenched by the addition of LDS sample buffer (Life Technologies). Samples were analyzed by western blotting.

Additional details of experimental procedures are contained in the [Supplemental Information](#).

## SUPPLEMENTAL INFORMATION

Supplemental Information contains Supplemental Experimental Procedures, seven figures, and one table and can be found with this article online at <http://dx.doi.org/10.1016/j.molcel.2014.05.001>.

## AUTHOR CONTRIBUTIONS

E.R., K.J.P., and L.A.P. designed the study, interpreted data, and wrote the paper. E.R. planned and executed the majority of experiments. E.R., V.H.O., F.L., and M.W. generated cell lines. F.L. performed clonogenic assays. G.L.D. generated baculoviruses. L.A.P. and K.J.P. supervised the project. V.H.O. and F.L. contributed equally to this work.

## ACKNOWLEDGMENTS

We thank H. Kurumizaka (Waseda University) and M. Takata (Kyoto University) for the gift of FANCI and FANCD2 expression constructs; A. Alpi (Dundee),

G. Mosedale, and M. Johnson for DT40 cell lines; S. Kern (Johns Hopkins University School of Medicine), H. van de Vrugt (Netherlands Cancer Institute), N. Jones (University of Liverpool), and N. Adachi (Yokohama City University) for mammalian cell lines; E. Stephens and F. Begum for mass spectrometry; M. Hodkinson for anti-chicken FANCD2; R. Leiro for assistance with protein purification; and A. Carter, M. Babu, D. Komander, M. Lamers, and members of the K.J.P. and L.A.P. labs for comments on the manuscript. We thank L. Li (University of Texas MD Anderson Cancer Center) for communicating results prior to publication. This work was supported by the Medical Research Council (Centenary Award [E.R.] and grants MC\_U105192715 [L.A.P.] and MC\_U105178811 [K.J.P.]) and the March of Dimes Foundation (F.L.).

Received: August 14, 2013

Revised: February 7, 2014

Accepted: March 28, 2014

Published: June 5, 2014

## REFERENCES

- Ali, A.M., Pradhan, A., Singh, T.R., Du, C., Li, J., Wahengbam, K., Grassman, E., Auerbach, A.D., Pang, Q., and Meetei, A.R. (2012). FAAP20: a novel ubiquitin-binding FA nuclear core-complex protein required for functional integrity of the FA-BRCA DNA repair pathway. *Blood* 119, 3285–3294.
- Alpi, A., Langevin, F., Mosedale, G., Machida, Y.J., Dutta, A., and Patel, K.J. (2007). UBE2T, the Fanconi anemia core complex, and FANCD2 are recruited independently to chromatin: a basis for the regulation of FANCD2 monoubiquitination. *Mol. Cell Biol.* 27, 8421–8430.
- Alpi, A.F., Pace, P.E., Babu, M.M., and Patel, K.J. (2008). Mechanistic insight into site-restricted monoubiquitination of FANCD2 by Ube2t, FANCL, and FANCI. *Mol. Cell* 32, 767–777.
- Bürckstümmer, T., Bennett, K.L., Preradovic, A., Schütze, G., Hantschel, O., Superti-Furga, G., and Bauch, A. (2006). An efficient tandem affinity purification procedure for interaction proteomics in mammalian cells. *Nat. Methods* 3, 1013–1019.
- Cole, A.R., Lewis, L.P.C., and Walden, H. (2010). The structure of the catalytic subunit FANCL of the Fanconi anemia core complex. *Nat. Struct. Mol. Biol.* 17, 294–298.
- Collis, S.J., Ciccio, A., Deans, A.J., Horejsí, Z., Martin, J.S., Maslen, S.L., Skehel, J.M., Elledge, S.J., West, S.C., and Boulton, S.J. (2008). FANCM and FAAP24 function in ATR-mediated checkpoint signaling independently of the Fanconi anemia core complex. *Mol. Cell* 32, 313–324.
- Crossan, G.P., and Patel, K.J. (2012). The Fanconi anaemia pathway orchestrates incisions at sites of crosslinked DNA. *J. Pathol.* 226, 326–337.
- Cybulski, K.E., and Howlett, N.G. (2011). FANCP/SLX4: a Swiss army knife of DNA interstrand crosslink repair. *Cell Cycle* 10, 1757–1763.
- Deans, A.J., and West, S.C. (2009). FANCM connects the genome instability disorders Bloom's Syndrome and Fanconi Anemia. *Mol. Cell* 36, 943–953.
- García-Higuera, I., Kuang, Y., Denham, J., and D'Andrea, A.D. (2000). The fanconi anemia proteins FANCA and FANCG stabilize each other and promote the nuclear accumulation of the Fanconi anemia complex. *Blood* 96, 3224–3230.
- García-Higuera, I., Taniguchi, T., Ganesan, S., Meyn, M.S., Timmers, C., Hejna, J., Grompe, M., and D'Andrea, A.D. (2001). Interaction of the Fanconi anemia proteins and BRCA1 in a common pathway. *Mol. Cell* 7, 249–262.
- Gordon, S.M., Alon, N., and Buchwald, M. (2005). FANCC, FANCD2, and FANCD2 form a ternary complex essential to the integrity of the Fanconi anemia DNA damage response pathway. *J. Biol. Chem.* 280, 36118–36125.
- Hodson, C., and Walden, H. (2012). Towards a molecular understanding of the fanconi anemia core complex. *Anemia* 2012, 926787.
- Hodson, C., Cole, A.R., Lewis, L.P.C., Miles, J.A., Purkiss, A., and Walden, H. (2011). Structural analysis of human FANCL, the E3 ligase in the Fanconi anemia pathway. *J. Biol. Chem.* 286, 32628–32637.
- Hodson, C., Purkiss, A., Miles, J.A., and Walden, H. (2014). Structure of the human FANCL RING-Ube2T complex reveals determinants of cognate E3-E2 selection. *Structure* 22, 337–344.

- Howlett, N.G., Taniguchi, T., Durkin, S.G., D'Andrea, A.D., and Glover, T.W. (2005). The Fanconi anemia pathway is required for the DNA replication stress response and for the regulation of common fragile site stability. *Hum. Mol. Genet.* **14**, 693–701.
- Huang, M., and D'Andrea, A.D. (2010). A new nuclease member of the FANCL club. *Nat. Struct. Mol. Biol.* **17**, 926–928.
- Huang, Y., Leung, J.W.C., Lowery, M., Matsushita, N., Wang, Y., Shen, X., Huang, D., Takata, M., Chen, J., and Lei Li, L. (2014). Modularized functions of the Fanconi anemia core complex. *Cell Rep* **7**. Published online June 5, 2014. <http://dx.doi.org/10.1016/j.celrep.2014.04.029>.
- Ishiai, M., Kitao, H., Smogorzewska, A., Tomida, J., Kinomura, A., Uchida, E., Saberi, A., Kinoshita, E., Kinoshita-Kikuta, E., Koike, T., et al. (2008). FANCI phosphorylation functions as a molecular switch to turn on the Fanconi anemia pathway. *Nat. Struct. Mol. Biol.* **15**, 1138–1146.
- Joo, W., Xu, G., Persky, N.S., Smogorzewska, A., Rudge, D.G., Buzovetsky, O., Elledge, S.J., and Pavletich, N.P. (2011). Structure of the FANCI-FANCD2 complex: insights into the Fanconi anemia DNA repair pathway. *Science* **333**, 312–316.
- Kim, H., and D'Andrea, A.D. (2012). Regulation of DNA cross-link repair by the Fanconi anemia/BRCA pathway. *Genes Dev.* **26**, 1393–1408.
- Kim, J.M., Kee, Y., Gurtan, A., and D'Andrea, A.D. (2008). Cell cycle-dependent chromatin loading of the Fanconi anemia core complex by FANCM/FAAP24. *Blood* **111**, 5215–5222.
- Kim, J.M., Parmar, K., Huang, M., Weinstock, D.M., Ruit, C.A., Kutok, J.L., and D'Andrea, A.D. (2009). Inactivation of murine Usp1 results in genomic instability and a Fanconi anemia phenotype. *Dev. Cell* **16**, 314–320.
- Knipscheer, P., Räschele, M., Smogorzewska, A., Enoiu, M., Ho, T.V., Schärer, O.D., Elledge, S.J., and Walter, J.C. (2009). The Fanconi anemia pathway promotes replication-dependent DNA interstrand cross-link repair. *Science* **326**, 1698–1701.
- Kottemann, M.C., and Smogorzewska, A. (2013). Fanconi anaemia and the repair of Watson and Crick DNA crosslinks. *Nature* **493**, 356–363.
- Langevin, F., Crossan, G.P., Rosado, I.V., Arends, M.J., and Patel, K.J. (2011). Fancd2 counteracts the toxic effects of naturally produced aldehydes in mice. *Nature* **475**, 53–58.
- Leung, J.W.C., Wang, Y., Fong, K.W., Huen, M.S.Y., Li, L., and Chen, J. (2012). Fanconi anemia (FA) binding protein FAAP20 stabilizes FA complementation group A (FANCA) and participates in interstrand cross-link repair. *Proc. Natl. Acad. Sci. USA* **109**, 4491–4496.
- Léveillé, F., Blom, E., Medhurst, A.L., Bier, P., Laghmani, H., Johnson, M., Roomans, M.A., Sobock, A., Waisfisz, Q., Arwert, F., et al. (2004). The Fanconi anemia gene product FANCF is a flexible adaptor protein. *J. Biol. Chem.* **279**, 39421–39430.
- Ling, C., Ishiai, M., Ali, A.M., Medhurst, A.L., Neveling, K., Kalb, R., Yan, Z., Xue, Y., Oostra, A.B., Auerbach, A.D., et al. (2007). FAAP100 is essential for activation of the Fanconi anemia-associated DNA damage response pathway. *EMBO J.* **26**, 2104–2114.
- Longerich, S., San Filippo, J., Liu, D., and Sung, P. (2009). FANCI binds branched DNA and is monoubiquitinated by UBE2T-FANCL. *J. Biol. Chem.* **284**, 23182–23186.
- Machida, Y.J., Machida, Y., Chen, Y., Gurtan, A.M., Kupfer, G.M., D'Andrea, A.D., and Dutta, A. (2006). UBE2T is the E2 in the Fanconi anemia pathway and undergoes negative autoregulation. *Mol. Cell* **23**, 589–596.
- Matsushita, N., Kitao, H., Ishiai, M., Nagashima, N., Hirano, S., Okawa, K., Ohta, T., Yu, D.S., McHugh, P.J., Hickson, I.D., et al. (2005). A FancD2-mono-ubiquitin fusion reveals hidden functions of Fanconi anemia core complex in DNA repair. *Mol. Cell* **19**, 841–847.
- Medhurst, A.L., Laghmani, H., Steltenpool, J., Ferrer, M., Fontaine, C., de Groot, J., Roomans, M.A., Scheper, R.J., Meetei, A.R., Wang, W., et al. (2006). Evidence for subcomplexes in the Fanconi anemia pathway. *Blood* **108**, 2072–2080.
- Meetei, A.R., de Winter, J.P., Medhurst, A.L., Wallisch, M., Waisfisz, Q., van de Vrugt, H.J., Oostra, A.B., Yan, Z., Ling, C., Bishop, C.E., et al. (2003a). A novel ubiquitin ligase is deficient in Fanconi anemia. *Nat. Genet.* **35**, 165–170.
- Meetei, A.R., Sechi, S., Wallisch, M., Yang, D., Young, M.K., Joenje, H., Hoatlin, M.E., and Wang, W. (2003b). A multiprotein nuclear complex connects Fanconi anemia and Bloom syndrome. *Mol. Cell Biol.* **23**, 3417–3426.
- Meetei, A.R., Levitus, M., Xue, Y., Medhurst, A.L., Zwaan, M., Ling, C., Roomans, M.A., Bier, P., Hoatlin, M., Pals, G., et al. (2004). X-linked inheritance of Fanconi anemia complementation group B. *Nat. Genet.* **36**, 1219–1224.
- Montes de Oca, R., Andreassen, P.R., Margossian, S.P., Gregory, R.C., Taniguchi, T., Wang, X., Houghtaling, S., Grompe, M., and D'Andrea, A.D. (2005). Regulated interaction of the Fanconi anemia protein, FANCD2, with chromatin. *Blood* **105**, 1003–1009.
- Mosedale, G., Niedzwiedz, W., Alpi, A., Perrina, F., Pereira-Leal, J.B., Johnson, M., Langevin, F., Pace, P., and Patel, K.J. (2005). The vertebrate Hef ortholog is a component of the Fanconi anemia tumor-suppressor pathway. *Nat. Struct. Mol. Biol.* **12**, 763–771.
- Niedzwiedz, W., Mosedale, G., Johnson, M., Ong, C.Y., Pace, P., and Patel, K.J. (2004). The Fanconi anaemia gene FANCC promotes homologous recombination and error-prone DNA repair. *Mol. Cell* **15**, 607–620.
- Nijman, S.M.B., Huang, T.T., Dirac, A.M.G., Brummelkamp, T.R., Kerkhoven, R.M., D'Andrea, A.D., and Bernards, R. (2005). The deubiquitinating enzyme USP1 regulates the Fanconi anemia pathway. *Mol. Cell* **17**, 331–339.
- Nookala, R.K., Hussain, S., and Pellegrini, L. (2007). Insights into Fanconi Anaemia from the structure of human FANCE. *Nucleic Acids Res.* **35**, 1638–1648.
- Oestergaard, V.H., Langevin, F., Kuiken, H.J., Pace, P., Niedzwiedz, W., Simpson, L.J., Ohzeki, M., Takata, M., Sale, J.E., and Patel, K.J. (2007). Deubiquitination of FANCD2 is required for DNA crosslink repair. *Mol. Cell* **28**, 798–809.
- Pace, P., Johnson, M., Tan, W.M., Mosedale, G., Sng, C., Hoatlin, M., de Winter, J., Joenje, H., Gergely, F., and Patel, K.J. (2002). FANCE: the link between Fanconi anaemia complex assembly and activity. *EMBO J.* **21**, 3414–3423.
- Polito, D., Cukras, S., Wang, X., Spence, P., Moreau, L., D'Andrea, A.D., and Kee, Y. (2014). The Carboxy Terminus of FANCE Recruits FANCD2 to the FA E3 Ligase Complex to Promote the Fanconi Anemia DNA Repair Pathway. *J. Biol. Chem.* **289**, 7003–7010.
- Räschele, M., Knipscheer, P., Enoiu, M., Angelov, T., Sun, J., Griffith, J.D., Ellenberger, T.E., Schärer, O.D., and Walter, J.C. (2008). Mechanism of replication-coupled DNA interstrand crosslink repair. *Cell* **134**, 969–980.
- Rosado, I.V., Niedzwiedz, W., Alpi, A.F., and Patel, K.J. (2009). The Walker B motif in avian FANCM is required to limit sister chromatid exchanges but is dispensable for DNA crosslink repair. *Nucleic Acids Res.* **37**, 4360–4370.
- Sareen, A., Chaudhury, I., Adams, N., and Sobock, A. (2012). Fanconi anemia proteins FANCD2 and FANCI exhibit different DNA damage responses during S-phase. *Nucleic Acids Res.* **40**, 8425–8439.
- Sato, K., Toda, K., Ishiai, M., Takata, M., and Kurumizaka, H. (2012). DNA robustly stimulates FANCD2 monoubiquitylation in the complex with FANCI. *Nucleic Acids Res.* **40**, 4553–4561.
- Seki, S., Ohzeki, M., Uchida, A., Hirano, S., Matsushita, N., Kitao, H., Oda, T., Yamashita, T., Kashihara, N., Tsubahara, A., et al. (2007). A requirement of FancL and FancD2 monoubiquitination in DNA repair. *Genes Cells* **12**, 299–310.
- Sims, A.E., Spiteri, E., Sims, R.J., 3rd, Arita, A.G., Lach, F.P., Landers, T., Wurm, M., Freund, M., Neveling, K., Hanenberg, H., et al. (2007). FANCI is a second monoubiquitinated member of the Fanconi anemia pathway. *Nat. Struct. Mol. Biol.* **14**, 564–567.
- Singh, T.R., Bakker, S.T., Agarwal, S., Jansen, M., Grassman, E., Godthelp, B.C., Ali, A.M., Du, C.-H., Roomans, M.A., Fan, Q., et al. (2009). Impaired FANCD2 monoubiquitination and hypersensitivity to camptothecin uniquely characterize Fanconi anemia complementation group M. *Blood* **114**, 174–180.

- Singh, T.R., Saro, D., Ali, A.M., Zheng, X.-F., Du, C.-H., Killen, M.W., Sachatzidis, A., Wahengbam, K., Pierce, A.J., Xiong, Y., et al. (2010). MHF1-MHF2, a histone-fold-containing protein complex, participates in the Fanconi anemia pathway via FANCM. *Mol. Cell* 37, 879–886.
- Smogorzewska, A., Matsuoka, S., Vinciguerra, P., McDonald, E.R., 3rd, Hurov, K.E., Luo, J., Ballif, B.A., Gygi, S.P., Hofmann, K., D'Andrea, A.D., and Elledge, S.J. (2007). Identification of the FANCI protein, a monoubiquitinated FANCD2 paralog required for DNA repair. *Cell* 129, 289–301.
- Sobeck, A., Stone, S., and Hoatlin, M.E. (2007). DNA structure-induced recruitment and activation of the Fanconi anemia pathway protein FANCD2. *Mol. Cell. Biol.* 27, 4283–4292.
- Taniguchi, T., and D'Andrea, A.D. (2002). The Fanconi anemia protein, FANCE, promotes the nuclear accumulation of FANCC. *Blood* 100, 2457–2462.
- Thomashevski, A., High, A.A., Drozd, M., Shabanowitz, J., Hunt, D.F., Grant, P.A., and Kupfer, G.M. (2004). The Fanconi anemia core complex forms four complexes of different sizes in different subcellular compartments. *J. Biol. Chem.* 279, 26201–26209.
- Tomida, J., Itaya, A., Shigechi, T., Unno, J., Uchida, E., Ikura, M., Masuda, Y., Matsuda, S., Adachi, J., Kobayashi, M., et al. (2013). A novel interplay between the Fanconi anemia core complex and ATR-ATRIP kinase during DNA cross-link repair. *Nucleic Acids Res.* 41, 6930–6941.
- Yamamoto, K., Ishiai, M., Matsushita, N., Arakawa, H., Lamerdin, J.E., Buerstedde, J.-M., Tanimoto, M., Harada, M., Thompson, L.H., and Takata, M. (2003). Fanconi anemia FANCG protein in mitigating radiation- and enzyme-induced DNA double-strand breaks by homologous recombination in vertebrate cells. *Mol. Cell. Biol.* 23, 5421–5430.
- Yan, Z., Delannoy, M., Ling, C., Dae, D., Osman, F., Muniandy, P.A., Shen, X., Oostra, A.B., Du, H., Steltenpool, J., et al. (2010). A histone-fold complex and FANCM form a conserved DNA-remodeling complex to maintain genome stability. *Mol. Cell* 37, 865–878.
- Yan, Z., Guo, R., Paramasivam, M., Shen, W., Ling, C., Fox, D., 3rd, Wang, Y., Oostra, A.B., Kuehl, J., Lee, D.-Y., et al. (2012). A ubiquitin-binding protein, FAAP20, links RNF8-mediated ubiquitination to the Fanconi anemia DNA repair network. *Mol. Cell* 47, 61–75.
- Yuan, F., El Hokayem, J., Zhou, W., and Zhang, Y. (2009). FANCI protein binds to DNA and interacts with FANCD2 to recognize branched structures. *J. Biol. Chem.* 284, 24443–24452.
- Yuan, F., Qian, L., Zhao, X., Liu, J.Y., Song, L., D'Urso, G., Jain, C., and Zhang, Y. (2012). Fanconi anemia complementation group A (FANCA) protein has intrinsic affinity for nucleic acids with preference for single-stranded forms. *J. Biol. Chem.* 287, 4800–4807.
- Zhang, X.-Y., Langenick, J., Traynor, D., Babu, M.M., Kay, R.R., and Patel, K.J. (2009). Xpf and not the Fanconi anemia proteins or Rev3 accounts for the extreme resistance to cisplatin in *Dictyostelium discoideum*. *PLoS Genet.* 5, e1000645.
- Zhang, Y., Zhou, X., Zhao, L., Li, C., Zhu, H., Xu, L., Shan, L., Liao, X., Guo, Z., and Huang, P. (2011). UBE2W interacts with FANCL and regulates the monoubiquitination of Fanconi anemia protein FANCD2. *Mol. Cells* 31, 113–122.
- Zimmerman, E.S., Schulman, B.A., and Zheng, N. (2010). Structural assembly of cullin-RING ubiquitin ligase complexes. *Curr. Opin. Struct. Biol.* 20, 714–721.



**Molecular Cell, Volume 54**

**Supplemental Information**

**The Genetic and Biochemical Basis  
of FANCD2 Monoubiquitination**

**Eeson Rajendra, Vibe H. Oestergaard, Frédéric Langevin, Meng Wang, Gillian L.  
Dornan, Ketan J. Patel, and Lori A. Passmore**

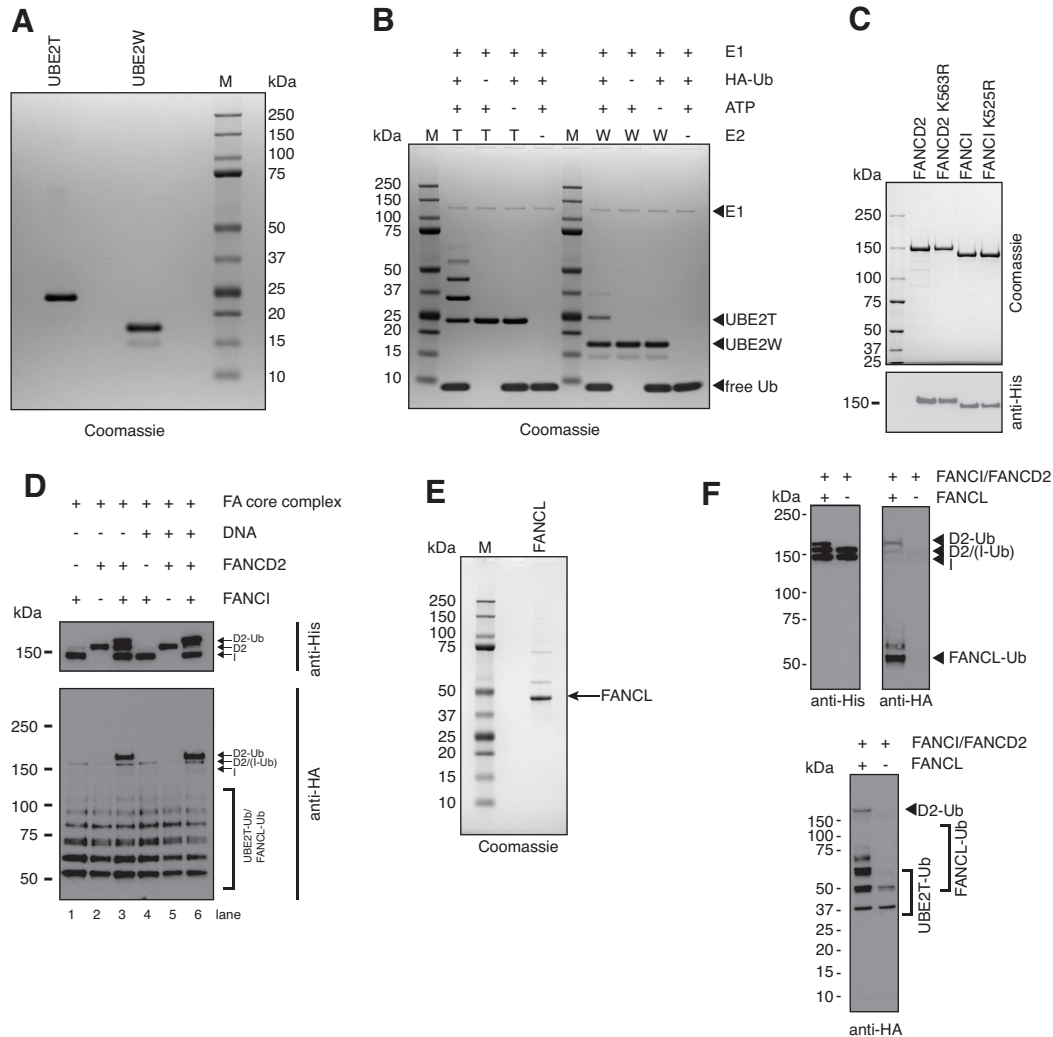

**Figure S1, related to Figure 3. Purification of components and validation of the FANCD2 ubiquitination assay.** (A) Coomassie blue-stained SDS-PAGE of purified UBE2T and UBE2W. (B) To check the activities of UBE2T and UBE2W, autoubiquitination assays were performed in the presence of 75 nM E1, 20  $\mu$ M HA-ubiquitin, 2 mM ATP and 5  $\mu$ M E2 enzyme (UBE2T, T or UBE2W, W). Assays were analyzed by SDS-PAGE followed by Coomassie blue staining. M is molecular weight marker. (C) Coomassie blue-stained SDS-PAGE gel (top) and Western blot using anti-His antibody (bottom) of purified chicken His-tagged FANCD2, FANCD2<sup>K563R</sup> and FANCI, FANCI<sup>K525R</sup>. (D) *In vitro* reconstitution of monoubiquitination of FANCI, FANCD2 and the FANCI-FANCD2 complex in the absence or presence of 5'-flapped DNA after an extended incubation of the reactions presented in Figure 3B (90 min at 30 °C followed by 12 h at room temperature). (E) Coomassie blue-stained SDS-PAGE of purified chicken FANCL. (F) Reconstitution of FANCL-mediated FANCD2 monoubiquitination in the presence of FANCI. Reactions were resolved by 3-8% (upper panels) and 4-12% (bottom panel) SDS-PAGE and analysed by Western blotting with antibodies against FANCI-FANCD2 (anti-His) or ubiquitin (anti-HA). Unmodified FANCI and FANCD2 showed mild cross-reactivity with the anti-HA antibody.

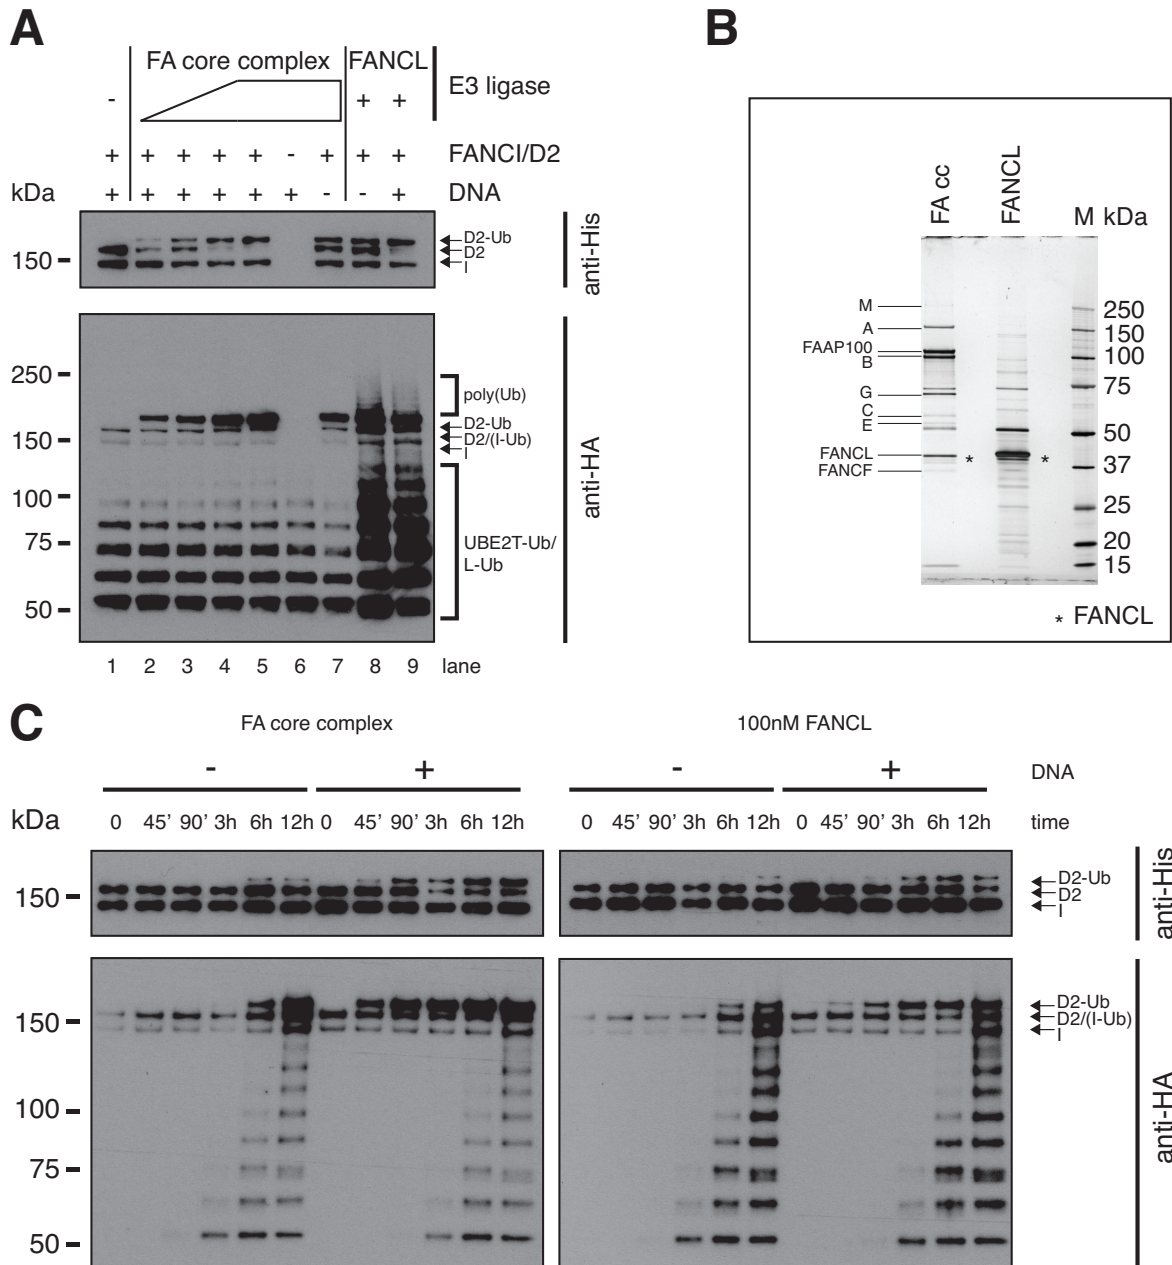

**Figure S2, related to Figure 4. The FA core complex has higher activity than FANCL alone.** (A) Titration of the FA core complex in a two-fold dilution series is compared to isolated FANCL in the monoubiquitination assay after an extended incubation (90 min at 30 °C followed by 12 h at room temperature) of the reactions presented in Figure 4A. (B) Silver-stained gel showing relative amounts of the purified FA core complex (at the highest concentration, lanes 5-7 of Figure 4A and S2A) and isolated FANCL used in the reactions presented in Figure 4A and S2A. Residual linker peptide (after GST cleavage) causes slower migration of recombinant FANCL compared to endogenous FANCL (indicated by asterisks). (C) Time course of FANCD2 monoubiquitination by the intact FA core complex (left) and a molar equivalent amount of recombinant FANCL (right). Anti-His blots detect His-tagged FANCD2 and FANCI (reproduced from Figure 4B); anti-HA blots detect HA-ubiquitin.





**Figure S3, related to Figure 4. Ubiquitination of FANCI and FANCD2 in the presence of UBE2T and UBE2W.** (A) Ubiquitination of wild-type and non-ubiquitinatable (KR) FANCI and FANCD2, in the absence and presence of DNA was reconstituted with recombinant FANCL (1  $\mu$ M). Assays were performed with either UBE2T (T) or UBE2W (W), both of which have been shown to bind FANCL. Reactions were analysed by Western blotting with antibodies against FANCI-FANCD2 (anti-His) or ubiquitin (anti-HA). Nonspecific monoubiquitination by UBE2W (odd lanes, W) is in agreement with recent reports showing that UBE2W can mediate *in vitro* monoubiquitination of the amino groups of substrate N-termini, not a specific internal acceptor lysine (Scaglione et al., 2013; Tatham et al., 2013). (B) Ubiquitination of wild-type (WT) and non-ubiquitinatable (KR) FANCI and FANCD2, in the absence and presence of DNA was reconstituted with the FA core complex ( $\sim$  65 nM) with either UBE2T or UBE2W for 90 min. Western blots with anti-His antibody are shown. (C) Targeting strategy for the generation of the  $\Delta$ UBE2W DT40 cell line. Exons are shown as green (exon 4) or black boxes. (D) PCR confirmation of genomic targeting of *UBE2W* and *FANCC* using oligos to amplify the deleted exons. (E) Cellular sensitivity of WT,  $\Delta$ UBE2T,  $\Delta$ FANCB and two independently generated clones of  $\Delta$ UBE2W DT40 cells after exposure to indicated doses of mitomycin C (MMC). The mean % survival  $\pm$  S.E.M. of three independent experiments are plotted, relative to untreated cells. The dotted line indicates 50% survival showing that  $\Delta$ UBE2T and  $\Delta$ FANCB cell lines have approximately 20-fold lower LD50s than WT or  $\Delta$ UBE2W cells. (F) Basal and MMC-induced FANCD2 monoubiquitination were examined in cell extracts of WT,  $\Delta$ UBE2W,  $\Delta$ UBE2T and  $\Delta$ FANCB DT40 cells lines by Western blotting. FANCD2 ubiquitination is intact in  $\Delta$ UBE2W cells.

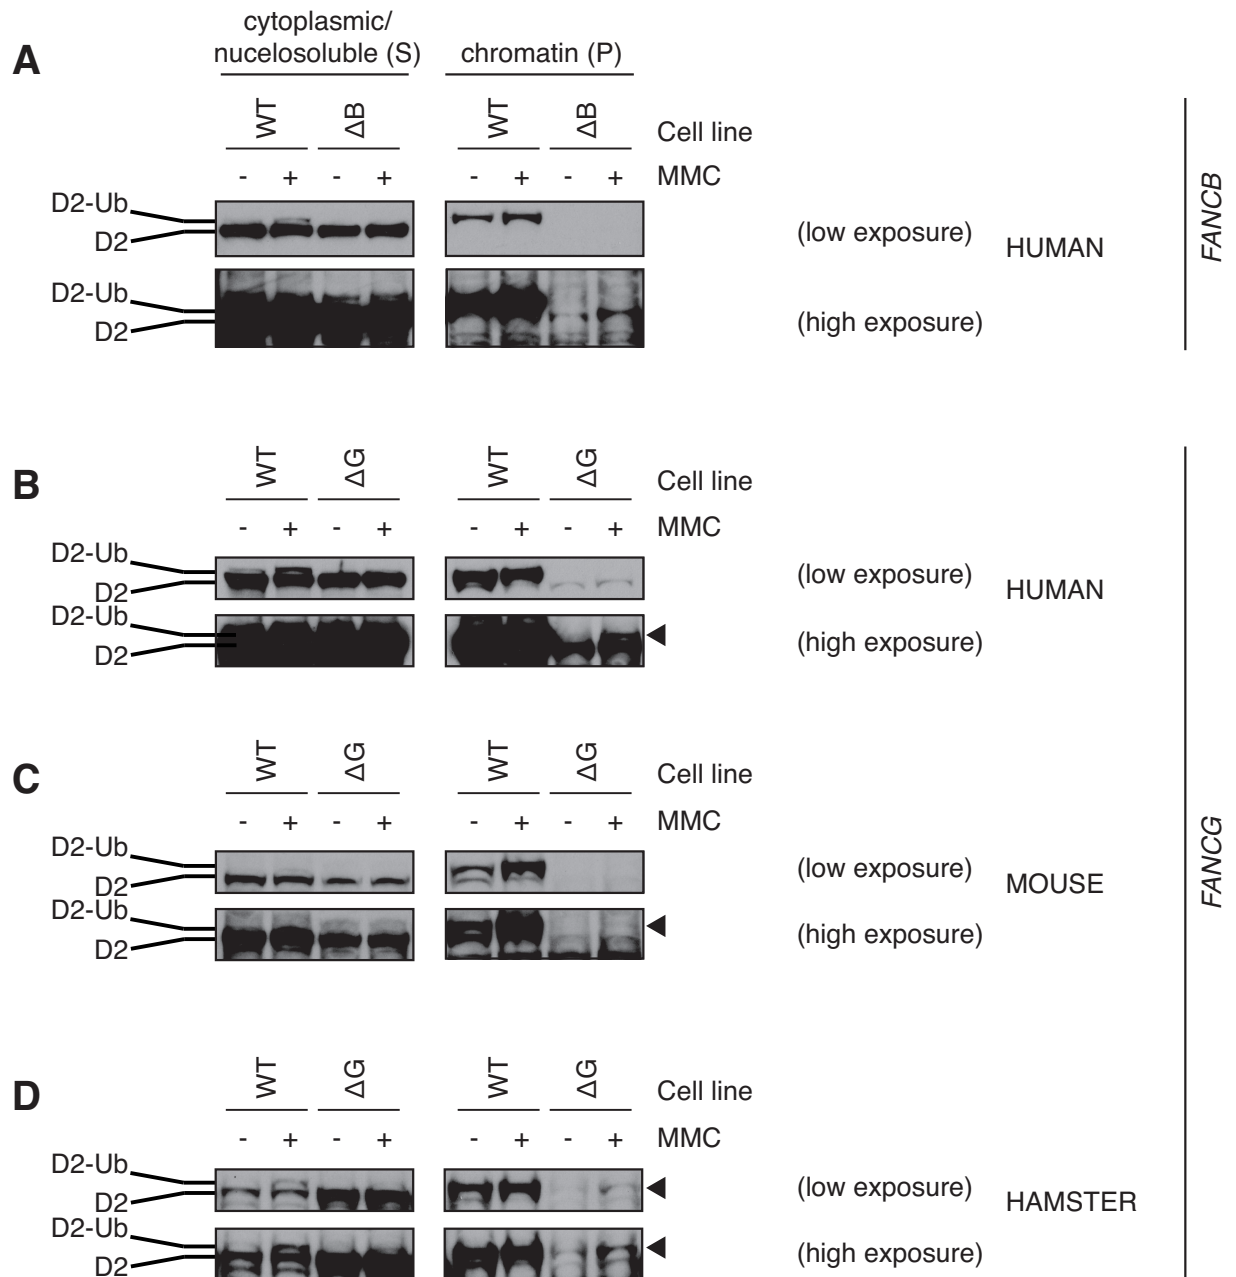

**Figure S4, related to Figure 5. Residual FANCD2 monoubiquitination is observed in mammalian cells.** Isogenic pairs of mammalian cell lines with targeted deletions of indicated FA core complex subunit deletions were treated with mitomycin C (MMC), fractionated into cytonucleoplasmic (S) and chromatin (P) fractions, and analyzed by Western blotting with an anti-FANCD2 antibody. In agreement with results in chicken DT40 cells, FANCD2 ubiquitination was (A) ablated in  $\Delta FANCB$  human NALM6 cells (Nomura et al., 2007) but residual ubiquitination could be observed in  $\Delta FANCG$  cells from (B) human (RKO cells; Gallmeier et al., 2006), (C) mouse (Koomen, 2002) and (D) hamster (NM3 CHO cells; Wilson et al., 2001). Residual ubiquitination is indicated by arrowheads.

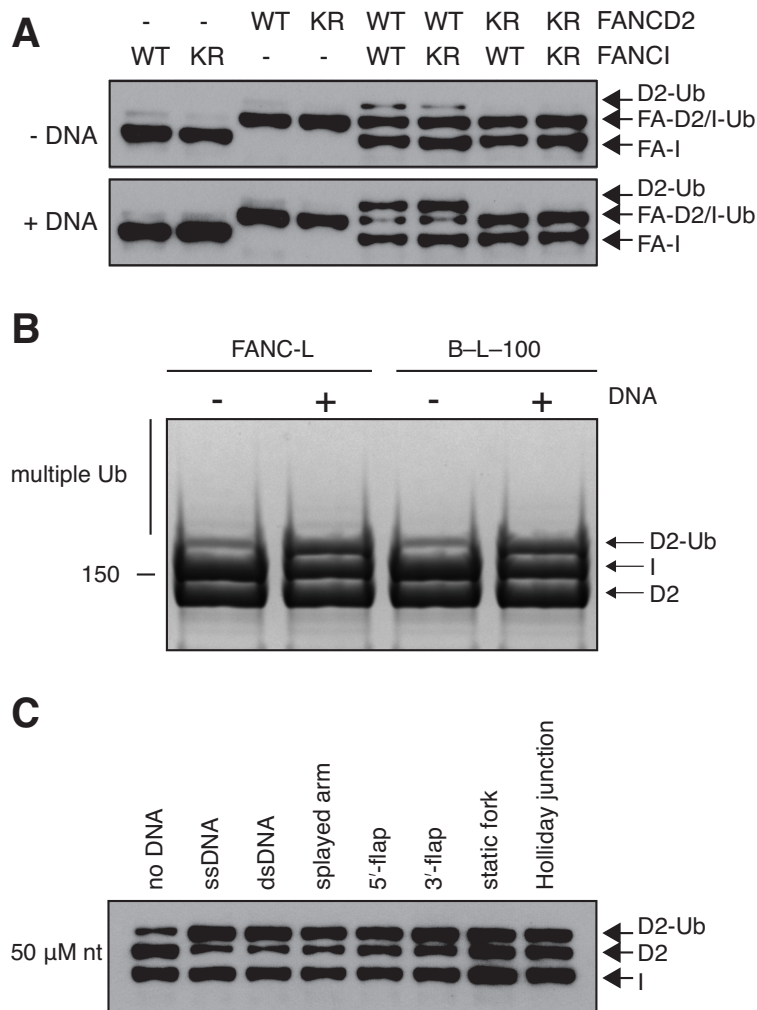

**Figure S5, related to Figure 6. FANCD2 monoubiquitination by the FANCB-FANCL-FAAP100 (B-L-100) subcomplex.** (A) Monoubiquitination of wild-type and non-ubiquitinatable (lysine to arginine, KR) mutants of FANCI and FANCD2 in the absence and presence of DNA by 200 nM B-L-100 for 90 min at 30 °C. Wild-type FANCD2 is ubiquitinated in the presence of FANCI or FANCI<sup>K525R</sup>. Isolated FANCI and FANCD2 (WT and KR) are also weakly modified. (B) Coomassie blue-stained SDS-PAGE gel of FANCD2 ubiquitination by 0.8  $\mu$ M FANCL and 0.15  $\mu$ M B-L-100. These E3 concentrations allow similar amounts of FANCD2 monoubiquitination (see Figure 6C). FANCL shows increased multi-ubiquitination events on FANCD2. (C) Stimulation of FANCD2 monoubiquitination by 200 nM B-L-100 in the presence of different DNA substrates at 50  $\mu$ M total nucleotide concentration (compared to 1 $\mu$ M of the DNA molecules, equimolar to the FANCI-FANCD2 substrates, in Figure 6E).

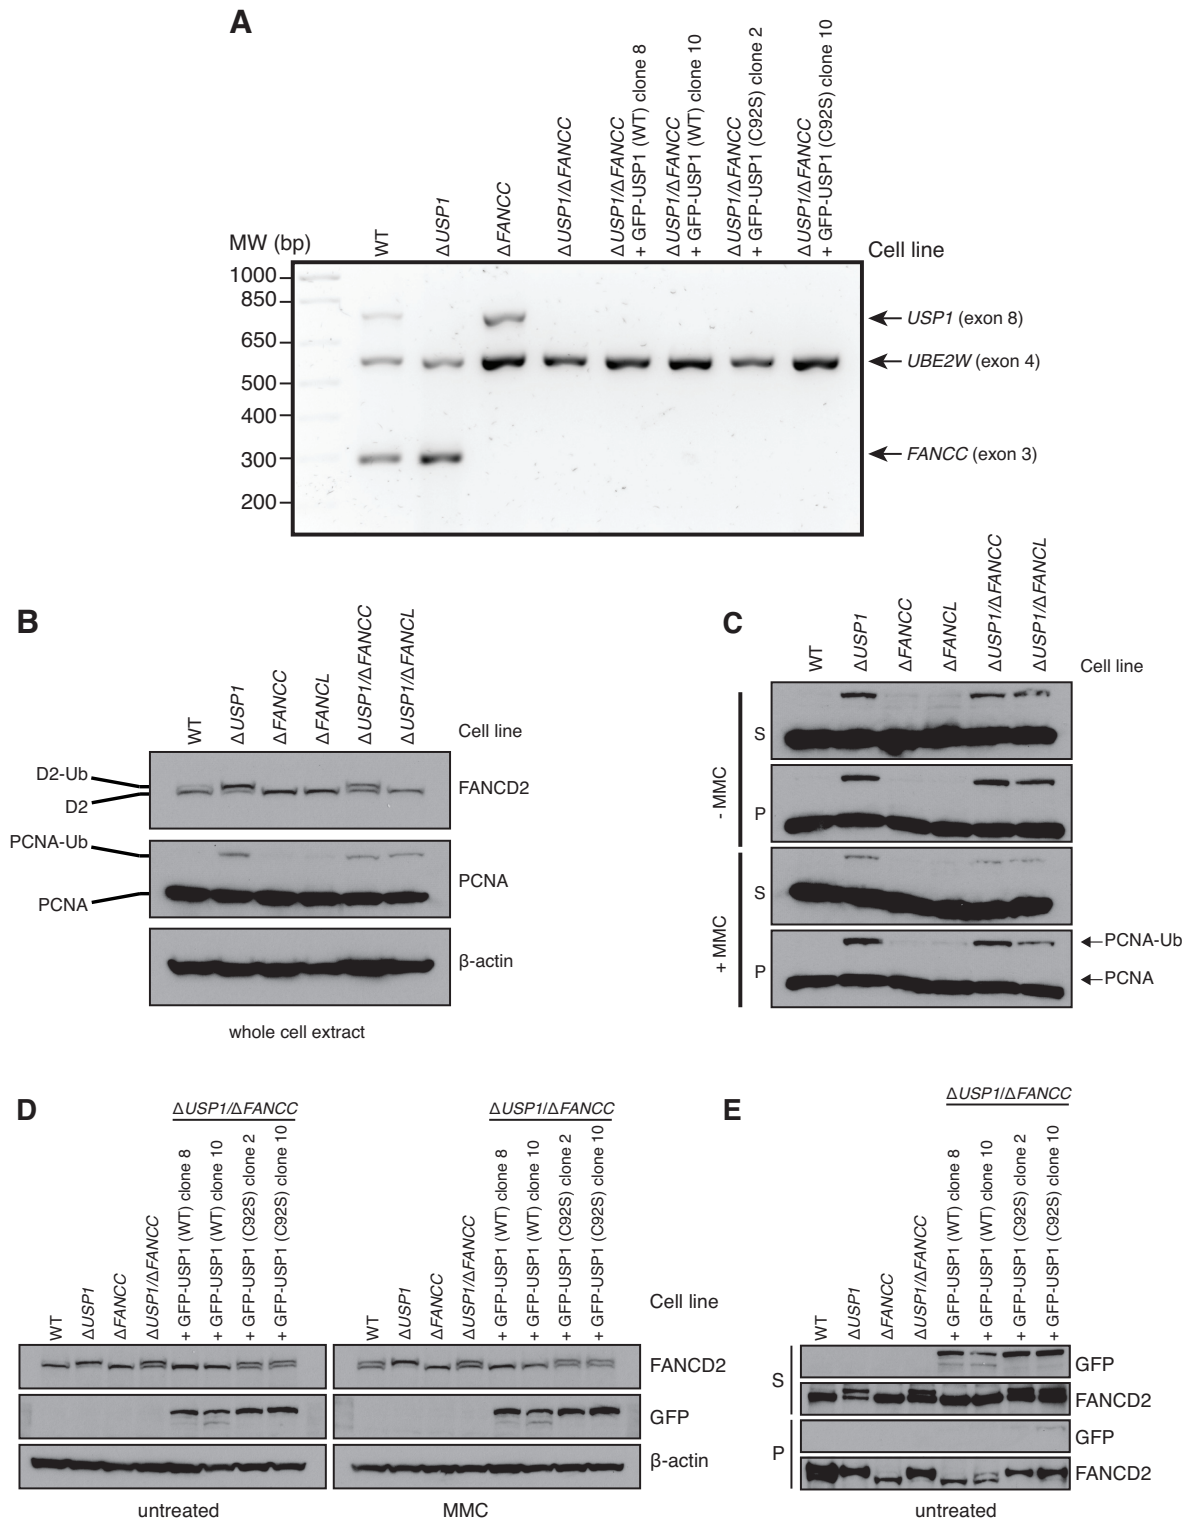

**Figure S6, related to Figure 7. Genetic analysis of FANCD2 ubiquitination in  $\Delta$ USP1/ $\Delta$ FANCC DT40 cells. (A) PCR confirmation of genomic targeting of DT40 cells with indicated genotypes using oligos to amplify a region of *UBE2W* and the deleted regions of *USP1* and *FANCC*. (B) Western blots of whole cell extracts using anti-FANCD2, anti-PCNA**



and anti- $\beta$ -actin antibodies. PCNA monoubiquitination is enhanced in  $\Delta USP1$  cells but is not affected by additional loss of *FANCC* or *FANCL*. **(C)** Anti-PCNA Western blot of cytonucleosoluble (S) and chromatin (P) fractions in the presence and absence of mitomycin C (MMC) treatment. **(D)** Western blot of FANCD2 monoubiquitination in whole cell extracts in the absence or presence of MMC. Stable expression of GFP-USP1 (WT), but not a catalytically inactive mutant GFP-USP1 (C92S; Oestergaard et al., 2007), restores FANCD2 deubiquitination in  $\Delta USP1/\Delta FANCC$  cells. **(E)** Western blot of FANCD2 monoubiquitination in cytonucleosoluble (S) and chromatin (P) fractions. Deubiquitination is restored by stable expression of GFP-USP1 (WT) in  $\Delta USP1/\Delta FANCC$  cells. Expression level of GFP-USP1 (WT) correlates with degree of rescue (compare clones 8 and 10).

| FA protein | Relative abundance |
|------------|--------------------|
| A          | 0.25 +/- 0.01      |
| B          | 1.00               |
| C          | 0.09 +/- 0.02      |
| E          | 0.08 +/- 0.02      |
| F          | 0.09 +/- 0.01      |
| FAAP100    | 1.15 +/- 0.06      |
| G          | 0.30 +/- 0.04      |
| L          | 1.03 +/- 0.15      |
| M          | 0.02 +/- 0.01      |

**Table S1, related to Figure 2. Quantitation of the relative abundances of FA core complex subunits.** Purified FA core complex was analyzed by SDS-PAGE followed by SYPRO-Ruby staining. Abundance of protein was calculated relative to FANCB and normalized by molecular weight. It is expressed as the mean +/- S.D. from two independent purifications including the preparation in Figure 1B.

## SUPPLEMENTAL EXPERIMENTAL PROCEDURES

### **Purification of UBE2T**

Chicken *UBE2T* was cloned from a chicken (DT40) cDNA library using adapted primers (5'-AAGTT CTGTT TCAGG GCCCG ATGCA GAGAG CATCG CGGC-3' and 5'-ATGGT CTAGA AAGCT TTAGG GGTCC AGGCG AGATT TC-3') into the pOPINJ vector using an InFusion cloning kit (Clontech) according to the manufacturer's protocol.

pOPINJ-*GgUBE2T* was transformed into BL21-DE3 pLacI cells and grown in LB supplemented with ampicillin and chloramphenicol. Expression was induced at OD<sub>600</sub>=0.6 with 0.3 mM IPTG and grown at 22 °C overnight. Cells were harvested by centrifugation (4000 rpm, 4 °C, 25 min).

The cell pellet was resuspended in lysis buffer (50 mM Tris pH 8.0, 1 mM EDTA, 150 mM NaCl, 2 mM DTT) with 10 µg/ml DNase, 0.25 mg/ml lysozyme, 1 mM PMSF and Roche protease inhibitor cocktail. The suspension was rotated at 4 °C for 15 min and supplemented with MgCl<sub>2</sub> to 10 mM followed by rotation at 4 °C for 15 min. The lysate was sonicated on ice and supplemented with Igepal CA-630 to 0.1% followed by rotation at 4 °C for 15 min. The lysate was cleared by centrifugation (14 000 rpm, 4 °C, 30 min). The supernatant was incubated for 2 h at 4 °C with Glutathione Sepharose 4B beads (GE Healthcare Life Sciences) pre-equilibrated with lysis buffer. Beads were washed in a PD-10 column (GE Healthcare) with 30 bed volumes of lysis buffer with 0.1% Igepal CA-630, 60 bed volumes of lysis buffer with 0.5 M NaCl and 0.1% Igepal CA-630 and finally 60 bed volumes of cleavage buffer (50 mM Tris pH 7.4, 150 mM NaCl, 1 mM EDTA, 1 mM DTT, 0.1% Igepal CA630). Beads were transferred to a 2 ml collection tube and incubated with PreScission protease at 4 °C overnight with rotation to cleave the GST moiety, leaving a glycine-proline N-terminal extension. Eluted protein was collected by centrifugation through a Proteus mini clarification spin column (Generon). The flow-through, containing cleaved UBE2T, was applied to a S100 gel filtration column in buffer containing 50 mM HEPES pH 8.0, 150 mM NaCl, 10% glycerol and 5 mM β-mercaptoethanol and fractions containing pure *GgUBE2T* were pooled and concentrated in an Amicon Ultracel-15 10 K MWCO centrifugal filter unit to 2 mg/ml (Figure S1A).

### **Purification of UBE2W**

Chicken *UBE2W* was cloned from a commercially synthesised construct (IDT) using adapted primers (5'- AAGTT CTGTT TCAGG GCCCG ATGGC GTCCA TGCAG AAAAG-3' and 5'- ATGGT CTAGA AAGCT TTATC AACAT GTGTC ATCAT GATAC C-3') into the pOPINJ vector using an InFusion cloning kit (Clontech) according to the manufacturer's protocol.

pOPINJ-*GgUBE2W* was transformed into Rosetta2 pLysS cells and grown in 2XTY media supplemented with 1% glucose, 1 mM MgSO<sub>4</sub>, ampicillin and chloramphenicol. Expression was induced at OD<sub>600</sub>=2 with 1 mM IPTG at 30 °C for 2 h. Cells were harvested by centrifugation at (4000 rpm, 4 °C, 25 min).

The cell pellet was resuspended in lysis buffer (50 mM HEPES pH 8.0, 1 mM EDTA, 200 mM NaCl, 5 mM β-mercaptoethanol, 10% glycerol) supplemented with 0.25 mg/ml lysozyme, 1 mM PMSF, 2 mM benzamidine-HCl and Roche protease inhibitor cocktail. The lysate was sonicated on ice and supplemented with Igepal CA-630 to 0.1% followed by rotation at 4 °C for 15 min. The lysate was cleared by centrifugation (19 000 rpm, 4 °C, 25 min). The supernatant was incubated for 2 h at 4 °C with Glutathione Sepharose 4B beads pre-

equilibrated with lysis buffer. Beads were washed in a PD-10 column with 30 bed volumes of lysis buffer, 60 bed volumes of lysis buffer with 0.5 M NaCl and 60 bed volumes of cleavage buffer (50 mM HEPES pH 8.0, 150 mM NaCl, 1 mM EDTA, 10 mM  $\beta$ -mercaptoethanol). Beads were transferred to a 2 ml collection tube and incubated with PreScission protease at 4 °C overnight with rotation to cleave the GST moiety, leaving a glycine-proline N-terminal extension. Eluted protein was collected by centrifugation through Proteus mini clarification spin column (Generon). The flow-through, containing cleaved UBE2W was applied to a S75 gel filtration column in buffer containing 50 mM HEPES pH 8.0, 150 mM NaCl, 10% glycerol and 5 mM  $\beta$ -mercaptoethanol and fractions containing pure GgUBE2W were pooled and concentrated in an Amicon Ultracel-15 10 KMWCO centrifugal filter unit to 2 mg/ml (Figure S1A).

### **Purification of FANCL**

*Sf9* cells were infected with a baculovirus encoding chicken GST-FANCL as previously described (Alpi et al., 2008). Cells were resuspended in lysis buffer (50 mM HEPES pH 8.0, 0.5 M NaCl, 10% glycerol, 1 mM EDTA, 0.1% Igepal CA-630, 1 mM PMSF, 5 mM  $\beta$ -mercaptoethanol and Roche protease inhibitor cocktail). The lysate was sonicated on ice and cleared by centrifugation (18 000 rpm, 4 °C, 45 min). The supernatant was incubated for 2 h at 4 °C with Glutathione Sepharose 4B beads pre-equilibrated with lysis buffer. Beads were washed in a PD-10 column with 30 bed volumes of lysis buffer, 60 bed volumes of lysis buffer with 0.5 M NaCl and 60 bed volumes of cleavage buffer (50 mM HEPES pH 8.0, 150 mM NaCl, 1 mM EDTA, 10 mM  $\beta$ -mercaptoethanol). Beads were transferred to a 2 ml collection tube and incubated with PreScission protease at 4 °C overnight with rotation to cleave the GST moiety. Eluted protein was collected and dialysed against 50 mM HEPES pH 8.0, 150 mM NaCl, 10% glycerol and 5 mM  $\beta$ -mercaptoethanol (Figure S1E).

### **Purification of FANCI and FANCD2**

Constructs encoding chicken FANCI, FANCI<sup>K525R</sup>, FANCD2 and FANCD2<sup>K563R</sup> were a kind gift of H. Kurumizaka (Waseda University, Tokyo, Japan) and M. Takata (Kyoto University, Japan) and they were purified essentially as previously described (Sato et al., 2012). Briefly, proteins were expressed in Rosetta2-pLys cells and lysed in 50 mM HEPES pH 8.0, 0.5 M NaCl, 10% glycerol, 12 mM imidazole, 5 mM  $\beta$ -mercaptoethanol, 0.1% Igepal CA-630, 0.25 mg/ml lysozyme, 1 mM PMSF and protease inhibitor cocktail. Lysates were sonicated on ice, cleared by centrifugation (18 000 rpm, 4 °C, 45 min) and filtered through a 0.45  $\mu$ m membrane. Proteins were purified using HisTrap, Heparin and Resource Q columns. Protein was loaded onto a Superdex S200 gel filtration column and separated by size exclusion in 20 mM HEPES pH 8.0, 200 mM NaCl, 10% glycerol and 5 mM  $\beta$ -mercaptoethanol. Fractions containing pure protein were pooled and concentrated in an Amicon Ultracel-15 100 KMWCO centrifugal filter unit to ~3 mg/ml (Figure S1C). His-tags were retained on proteins for immunodetection.

### **Purification of FANCB–FANCL–FAAP100 complex**

cDNAs encoding full length *Gallus gallus* FANCB, FANCL and FAAP100 were synthesised (GeneArt). FANCB contained a C-terminal extension containing a PreScission protease site and StrepII tag. Both FANCL and FAAP100 were untagged. For protein expression, all genes



were cloned in to the Multibac expression system and constructs generated as per manufacturers protocols (Bieniossek et al., 2012; 2008).

Briefly, *FANCB* and *FANCL* were subcloned via *Bam*HI and *Xba*I into the vector pIDC to generate pIDC-*FANCB*-SII and pIDC-*FANCL*. *FAAP100* was subcloned via *Bam*HI and *Xba*I into the vector pACEBac1 to generate pACEBac1-*FAAP100*. *FANCL* was subcloned from pIDC-*FANCL* as a *Bst*XI-*PI*-*Sce*I fragment into the *PI*-*Sce*I site in pIDC-*FANCB*-SII to generate pIDC-*FANCB*-SII\**FANCL*. pIDC-*FANCB*-SII\**FANCL* and pACEBac1-*FAAP100* were then fused using Cre recombinase (NEB) to generate pACEBac1-*FAAP100*\*pIDC-*FANCB*-SII\**FANCL* (henceforth described as B-L-100). All constructs were confirmed by sequencing.

The B-L-100 construct was transformed under multiple antibiotic selection into DH10Bac *E. coli* competent cells containing the EmBacY expression bacmid. The purified bacmid was transfected into *Sf9* cells in SF900-II medium (Invitrogen) using FuGene HD transfection reagent (Promega). Infection was monitored by YFP expression. A third generation amplification of the baculovirus was used to infect *Sf9* cells for protein production.

At 72 hours post-infection, *Sf9* cells were resuspended in lysis buffer (100 mM HEPES pH 7.0, 250 mM NaCl, 5% glycerol, 0.5 mM TCEP, 1mM benzamidine and Roche protease inhibitor cocktail). The lysate was sonicated on ice and cleared by centrifugation (19 000 rpm, 4 °C, 45 min). The supernatant was loaded onto a Streptactin affinity column equilibrated with wash buffer (lysis buffer without glycerol) and eluted with wash buffer supplemented with 6 mM desthiobiotin. Peak fractions were pooled and loaded on to a HiTrap HP SP column and eluted over a salt gradient at around 500 mM NaCl. Subsequently, peak fractions were loaded onto a Superose 6 XK16/70 gel filtration column and separated by size exclusion in 50 mM HEPES pH 8.0, 200 mM NaCl, 10% glycerol and 0.5 mM TCEP. Fractions containing pure protein were pooled and concentrated in an Amicon Ultracel-15 100 KMWCO centrifugal filter unit to ~6 mg/ml. The complex contained all three components in unit stoichiometry as assessed by SDS-PAGE followed by SYPRO-Ruby staining. Protein concentration was determined by Nanodrop ( $A_{280\text{ nm}}$  and calculated extinction coefficients) and subsequently checked by SDS-PAGE followed by Coomassie-staining to ensure FANCL in the B-L-100 complex was equimolar to isolated FANCL for activity assays.

### **DNA substrates**

The DNA substrates were prepared by annealing HPLC-purified oligonucleotides resuspended in 20mM Tris pH 8.0, 50mM NaCl as previously described (Sato et al., 2012), for ssDNA (P1); dsDNA (P1, P7); splayed arm (P1, P2); 5' flapped DNA (P1, P2, P3); 3' flapped (P1, P2, P4); static fork (P1, P2, P3, P4); Holliday junction (P1, P2, P5, P6); and polyT (P8) substrates:

| Primer | Sequence                                                 |
|--------|----------------------------------------------------------|
| P1     | ATCGATGTCTCTAGACAGCTGCTCAGGATTGATCTGTAATGGCCTGGGA        |
| P2     | GTCCCAGGCCATTACAGATCAATCCTGAGCATGTTTACCAAGCGCATTG        |
| P3     | CAATGCGCTTGGTAAACA                                       |
| P4     | GCTGTCTAGAGACATCGAT                                      |
| P5     | TGATCACTTGCTAGCGTCGCAATCCTGAGCAGCTGTCTAGAGACATCGA        |
| P6     | CCAATGCGCTTGGTAAACATGCTCAGGATTGCGACGCTAGCAAGTGATC        |
| P7     | TCCCAGGCCATTACAGATCAATCCTGAGCAGCTGTCTAGAGACATCGAT        |
| P8     | TTTTTTTTTTTTTTTTTTTTTTTTTTTTTTTTTTTTTTTTTTTTTTTTTTTTTTTT |

### Cell Lines

DT40 cells were cultured in RPMI-1640 medium with L-glutamine (Gibco) supplemented with 7 % fetal bovine serum, 3 % chicken serum, 10  $\mu$ M  $\beta$ -mercaptoethanol and penicillin-streptomycin mix (Gibco), at 37 °C in a humidified atmosphere with 5 % CO<sub>2</sub>.

The  $\Delta$ *FANCB* cell line was generated as follows: The targeting construct for the disruption of the last 3 exons of *Gallus gallus FANCB* (exons 7, 8 and 9; Ensembl gene ID [ENSGALG00000016569](https://www.ensembl.org/Gallus_gallus/Transcript/View?g=ENSGALG00000016569), chromosome 1) was assembled by cloning the 5' homology arm as a 3.1kb *XhoI-BamHI* fragment and the 3' homology arm as a 5.4kb *BamHI-SpeI* fragment in pBluescript (Figure 1B). Homology arms were amplified from DT40 genomic DNA by PCR using *LA Taq* (TaKaRa, Japan), and the following oligonucleotides: 5' arm forward 5'-CCGTCGACGGGTTATCTTGGTAGCTTCAGTACCAGTCC (*SaII* adapted); 5' arm reverse 5'-CCGGATCCTCCAAGTTAATTCAGAGGCCGT GCAGTGTG (*BamHI* adapted); 3' arm forward 5'-CCGGATCCTATGTCACCT ATTTTATAGCTCAGATATT TGTAG (*BamHI* adapted); 3' arm reverse 5'-CCACTAGTAAAACAAACAAAAAACCCCTAACATTCATT CCTC (*SpeI* adapted). Drug resistance marker cassettes for histidinol and blasticidin were cloned as *BamHI* inserts. The construct was linearized by *NotI* restriction digest prior to transfection. Drug resistant clones were screened by Southern blot after *BamHI* restriction digest of genomic DNA (Figures 1B and 1C). The probe fragment was amplified from DT40 genomic DNA by PCR using *LA Taq* (TaKaRa, Japan), and the following oligonucleotides: 5'-GCAGTGTGCTTCCTTGCTGAGATCTCTGT; 5'-AAACAAAGCAAATTAAGTGGA GGCTT; and then subcloned into pCR<sup>®</sup>2.1-TOPO<sup>®</sup> vector. *EcoRI* restriction digest of the vector releases a 1.3 kb fragment used for <sup>32</sup>P labelling and hybridisation. The probe used for Southern blot screening of drug-resistant clones hybridizes with either a 18 kb or 23 kb band in the wild type allele, due to a *BamHI* restriction fragment length polymorphism in the genomic locus of *FANCB*. The insertion of the resistance marker introduces a new *BamHI* site, which converts the wild type band into a 5.6 kb band in the targeted allele (Figures 1B and 1C).

The plasmid encoding chicken *FANCB* with a C-terminal GS tag was constructed as follows: The C-terminal GS tag from pGA1-C-GStag (synthesised by GeneArt) was sub-cloned as a *XbaI-NotI* fragment into *NheI-NotI* downstream of a linker sequence in pGA14-

linker (synthesised by GeneArt) to generate pGA1-link-C-GS comprising a linker peptide (GGGSGGGTGGGSGGG) upstream of a Streptavidin-Binding Peptide (SBP) tag, TEV cleavage site and two protein-G IgG-binding moieties. The linker-GS fragment was subcloned as an *XbaI-NotI* fragment at the 3' end of *FANCB* cut with *NheI* and *NotI* in pCR2.1-*FANCB* cDNA. The complete *FANCB*-linker-GS fragment was subcloned as a *SpeI* fragment into the *NheI* site of pExpress-loxPuro and the orientation confirmed by sequencing.

The  $\Delta$ B/B-GS cell line was generated by stably transfecting the GS-tagged *FANCB* cDNA into the *FANCB*-deficient ( $\Delta$ B) DT40 line. DT40 cells were transfected using electroporation with a BioRad GenePulser II at 950  $\mu$ F and 250 volts and selected in media supplemented with 0.5  $\mu$ g/ml puromycin. Drug-resistant clones were screened by Western blot for expression of the GS-tagged *FANCB* protein. The  $\Delta$ B/B-GS/ $\Delta$ C cell line was generated by deleting *FANCC* as previously described (Niedzwiedz et al., 2004). Positive clones were confirmed by PCR amplification over the disrupted exon 2 and deleted exon 3 with oligonucleotides: 5'-GAGGA AATTA CTTAA GCTTT AACT-3' and 5'-CTACA ACAA GGGAT TCCAA CAAA-3'.

The targeting construct for the disruption of exon 4 of *GgUBE2W* (Ensembl gene ID [ENSGALG00000019468](#), chromosome 2), containing the catalytic residue C91 in the UBC domain, was assembled by cloning the 5' homology arm as a 4 kb *NotI-BamHI* fragment and the 3' homology arm as a 4.4 kb *BamHI-XhoI* fragment into pBluescript. Drug resistance marker cassettes for puromycin, blasticidin and histidinol were cloned as *BamHI* inserts. The construct was linearized by *NotI* restriction digest prior to transfection. Three sequential rounds of targeting were performed, as chromosome 2 in DT40 is triploid. Drug-resistant clones were screened by Southern blotting after *BamHI-KpnI* restriction digest of genomic DNA and PCR. The probe used for Southern blotting screening of drug-resistant clones hybridises with a 7.7 kb band in the wild type allele. The insertion of the resistance marker introduces a new *BamHI* site, which converts the wild type band into a 4 kb knock out band in the targeted allele. Homology arms were amplified from DT40 genomic DNA by PCR using *LA Taq* (TaKaRa, Japan), and the following oligonucleotides: 5' arm forward 5'-AAAGACATTG AGCCGTTGGAGTGG; 5' arm reverse 5'-GAAT ATTGTCACCAGTAAACATGA; 3' arm forward 5'-TTTCACCCATTCCAAGCTGGGATTTAT; 3' arm reverse 5'-CCCTGGTACAATGTCCATTGC. The probe fragment was amplified from DT40 gDNA by PCR using *LA Taq* (TaKaRa, Japan), and the following oligonucleotides: forward 5'-CTCATC TGTCTCACTTGCAACTGATGT; reverse 5'-TTCTGGAGCACCTTCCATGTCTACAA; and then subcloned in pCR<sup>®</sup>2.1-TOPO<sup>®</sup> vector. *EcoRI* restriction digest of the vector releases a 0.9 kb fragment used for <sup>32</sup>P labelling and hybridization. Targeting of the *GgUBE2W* locus was confirmed by PCR amplification of the deleted exon 4 with oligonucleotides: 5'-TCATATCT GTTTGTCCATTCT and 5'-TTCTTTGCAGCTGGAAAGCAT.

The constructs for stable expression of GFP-USP1(WT) and GFP-USP1(C92S) have been previously described(Oestergaard et al., 2007).

$\Delta$ *FANCC* (Niedzwiedz et al., 2004),  $\Delta$ *FANCG* (Niedzwiedz et al., 2004),  $\Delta$ *FANCL* (Alpi et al., 2007),  $\Delta$ *FAP100* (Ling et al., 2007),  $\Delta$ *FANCM* (Mosedale et al., 2005),  $\Delta$ *USP1* (Oestergaard et al., 2007) and  $\Delta$ *UBE2T* (Alpi et al., 2007) cell lines are previously published. For the  $\Delta$ *FANCA* cell line, a targeting construct for the disruption of exons 7, 8 and 9 of *GgFANCA* (Ensembl gene ID [ENSGALG0000000516](#), chromosome 11) was assembled by cloning the 5' homology arm as a 2 kb *SpeI-BglIII* fragment and the 3' homology arm as a 2 kb *BglIII-NotI* fragment in pBluescript. Drug resistance marker cassettes for blasticidin and

puromycin were cloned as *Bam*HI inserts in the *Bgl*II site. The  $\Delta$ FANCF cell line was generated as follows: The targeting construct for the disruption of the single exon of chicken FANCF (Ensembl gene ID [ENSGALG00000003660](#), chromosome 5) was assembled by cloning the 5' homology arm as a 2 kb *Sal*I-*Bam*HI fragment and the 3' homology arm as a 2 kb *Bam*HI-*Not*I fragment in pBluescript. Drug resistance marker cassettes for blasticidin and puromycin were cloned as *Bam*HI inserts. The construct was linearized by *Not*I restriction digest prior to transfection. Drug resistant clones were screened by Southern blot after *Nhe*I and *Spe*I restriction digest of genomic DNA. The probe used for Southern blot screening of drug-resistant clones is a 1 kb fragment that hybridises with a 5.3 kb band in the wild type allele. The insertion of the resistance marker removes a genomic *Nhe*I site, which converts the wild type band into a 7.5 kb (blasticidin) or 4.5 kb (puromycin) knock out band in the targeted allele, following the insertion of a new *Nhe*I site.

Human, mouse and hamster cells were maintained in DMEM medium (Gibco) with 10% fetal bovine serum and penicillin-streptomycin mix.

### **Fanconi Anaemia Core Complex Purification**

For purification,  $\Delta$ B/B-GS or  $\Delta$ B/B-GS/ $\Delta$ C DT40 cells were grown to confluency in 2 L roller bottles and harvested by centrifugation (2 000 rpm, 4 °C, 20 min). The cell pellet was washed twice in ice-cold PBS supplemented with a protease inhibitor cocktail. The tandem affinity purification scheme is modified from the protocol described by Bürckstümmer et al. (2006). The cell pellet (~3 g (wet) / 2-4 L culture) was resuspended in ice-cold GS buffer (50 mM HEPES pH 8.0, 150 mM NaCl, 5 % glycerol, 0.1 % Igepal CA-630, 1.5 mM MgCl<sub>2</sub>, 25 mM NaF, 2 mM Na<sub>3</sub>VO<sub>4</sub>, 40 mM  $\beta$ -glycerophosphate, 1 mM PMSF, 10 mM  $\beta$ -mercaptoethanol, PhosSTOP inhibitor cocktail (Roche) and protease inhibitor cocktail). The cell suspension was passed through 19 G and 25 G needles multiple times and incubated on ice for 20 min. The lysate was clarified by high-speed centrifugation (13 200 rpm, 4 °C, 40 min). All subsequent steps were performed at 4 °C unless otherwise stated.

For the first affinity step (via the protein-G IgG binding moieties in the GS tag), the lysate was incubated with IgG-agarose beads (Sigma) at 4 °C for 2 h with gentle rotation in a sealed PD-10 column. The beads were allowed to settle and the flow-through was collected by gravity. The beads were washed extensively with 30 bed volumes of wash buffer (50 mM HEPES pH 8.0, 150 mM NaCl, 10 % glycerol, and phosphatase/protease inhibitors) and 30 bed volumes of wash buffer supplemented with 5 mM  $\beta$ -mercaptoethanol. A tobacco etch virus (TEV) protease site upstream of the protein-G tag was cleaved to elute the protein complex from the beads: The beads were transferred to a LoBind 1.5 ml tube (Eppendorf) and incubated with 100  $\mu$ g TEV protease at 16 °C for 2 h with gentle agitation in a thermomixer. The cleavage reaction was transferred to a Proteus clarification mini spin column (Generon) and the supernatant collected by centrifugation (10 000 rpm, 4 °C, 5 min).

For the second affinity step, (via the SBP tag), the supernatant was incubated with Ultralink Streptavidin Plus Resin (Pierce) in a 1.5 ml tube with gentle rotation for 1 h. The binding reaction was transferred to a Poly-Prep chromatography column (BioRad) and washed with 100 bed volumes of wash buffer supplemented with 5 mM  $\beta$ -mercaptoethanol.

To mildly elute the SBP tag from streptavidin, the resin was transferred to a 1.5 ml tube and incubated with one bed volume of wash buffer supplemented with 3 mM  $\beta$ -mercaptoethanol and 6 mM D-biotin (Sigma) on ice for 20 min with gentle agitation. The elution reaction was transferred to a Proteus mini clarification spin column and the purified FA core

complex was collected by centrifugation (10 000 rpm, 4 °C, 5 min). The complex was resolved by SDS-PAGE and analysed by Coomassie, silver (Sigma) or SYPRO-Ruby (Lonza) staining. Gels were imaged on a BioRad ChemiDoc XRS+ imager and analyses performed using ImageLab 3.0 software (BioRad laboratories). Bands were excised, digested and identified by MS/MS (data not shown) using multiple independent purifications. The major species for each band is labelled on Figure 2B. The band containing tubulin also contains small amounts RuvBL1/2. Purified complex was used fresh, immediately after purification, for downstream biochemical analyses. A titration against known concentrations of recombinant FANCL was used to approximate the concentration of prepared FA core complex on SDS-PAGE. We estimate that from an ~3 g DT40 cell pellet (2-4 L cell culture), we purify ~5 µg FA core complex.

### **Whole cell extract preparation**

Cells were washed in PBS, harvested by trypsinization and collected by centrifugation. Whole cell extracts (WCEs) were prepared by lysis in ice-cold NET-N buffer (50 mM HEPES pH 8.0, 150 mM NaCl, 1 mM EDTA, 0.5 % Igepal CA-630) or ice-cold RIPA buffer (50 mM Tris-HCl pH 7.4, 150 mM NaCl, 0.5 % sodium deoxycholate, 0.1 % SDS and 1 % Igepal CA-630 (Sigma)). Buffers were freshly supplemented with 1 mM DTT, 1 mM PMSF, 2 mM Na<sub>3</sub>VO<sub>4</sub>, 25 mM NaF, 40 mM β-glycerophosphate, 1 X Halt Phosphatase Inhibitor Cocktail (Pierce) and a Protease Inhibitor Cocktail (Roche)). Lysates were cleared by centrifugation (13 200 rpm, 4 °C, 25 min). Protein concentration was quantified using the Bicinchoninic Assay (BCA) (Thermo Scientific). WCEs (30 µg per sample) were analyzed by Western blotting.

### **Cellular fractionation**

DT40 cells were fractionated into a cytosol/nucleosoluble fraction (S) and a chromatin/nuclear matrix fraction (P) essentially as previously described (Kim et al., 2008). Briefly, cells were lysed on ice in CSK buffer (20 mM PIPES pH 7.0, 100 mM NaCl, 340 mM sucrose, 1 mM EDTA, 0.3 % Triton X-100, 25 mM NaF, 1 mM Na<sub>3</sub>VO<sub>4</sub>, 1 mM PMSF, 1 mM DTT, protease inhibitor cocktail (Roche) and PhosSTOP (Roche)) and resuspended by gently pipetting. The supernatant (S) was collected by low speed centrifugation (1300 x g, 5 min, 4 °C). The pellet was washed again in CSK buffer and resuspended on ice in CSK buffer supplemented with 1 % Triton X-100, 0.5 % sodium deoxycholate, 0.1 % SDS and 0.5 M NaCl. Samples were vigorously vortexed, sonicated and the supernatant (P) collected by high-speed centrifugation (15 000 rpm, 1 h, 4 °C). Protein was quantitated, resolved by SDS-PAGE and analyzed by Western blotting.

### **Western blotting**

Samples were resolved by SDS-PAGE on 4–12 % Bis-Tris gels or 3–8 % Tris-Acetate gels (Life Technologies) and transferred to PVDF membranes (Millipore) in 1 X transfer buffer (Life Technologies) supplemented with 20 % methanol before blotting with the appropriate antibodies: HRP-conjugated anti-HA (F-7, Santa Cruz Biotechnology), HRP-conjugated anti-HIS (H-3, Santa Cruz Biotechnology), anti-β-actin (AC-15, Sigma), anti-PCNA (PC10, Santa Cruz Biotechnology), anti-GFP (FL, Santa Cruz Biotechnology), anti-chicken FANCG (Alpi et al., 2007), anti-chicken FANCM (Mosedale et al., 2005) or anti-chicken FANCD2 (gift of Michael Hodkinson, MRC LMB). The protein G moiety in the GS-tag is detected with the

antibody against FANCD2 in Figures 1D and 5A. Quantification of FANCD2 ubiquitination was performed using ImageJ software.

### **Ubiquitination assay**

Reactions in 10–20  $\mu$ l volumes were performed in a buffer comprising 50 mM HEPES pH 7.5, 64 mM NaCl, 4 % glycerol, 5 mM MgCl<sub>2</sub>, 2 mM ATP and 0.5 mM DTT. In all reactions, 75 nM E1 (Boston Biochem) and 1  $\mu$ M E2 (UBE2T or UBE2W) enzymes, 1  $\mu$ M substrate (FANCI, FANCI<sup>K525R</sup>, FANCD2, FANCD2<sup>K563R</sup>), 50  $\mu$ M 5'-flapped DNA (nucleotide concentration) and 20  $\mu$ M HA-ubiquitin (Boston Biochem) were used unless otherwise stated. E3 (FANCL or FA core complex) concentrations are indicated in figures. Optimal E2 and FANCL concentrations were determined by titrations.

All reactions were incubated at 30 °C for 90 min (or for indicated times as part of a time course) and quenched by the addition of LDS sample buffer (Life Technologies). Samples were analysed by Western blotting.

### **MMC treatment**

Cellular sensitivity of DT40 cells was assayed by a colony formation assay as previously described (Niedzwiędz et al., 2004). For induction of FANCD2 monoubiquitination, DT40 and human cells were treated for 18 h with 50 ng/ml MMC. Rodent cells were treated for 18 h with 333 ng/ml MMC.



## Supplemental References

- Bieniossek, C., Imasaki, T., Takagi, Y., and Berger, I. (2012). MultiBac: expanding the research toolbox for multiprotein complexes. *Trends Biochem. Sci.* *37*, 49–57.
- Bieniossek, C., Richmond, T.J., and Berger, I. (2008). MultiBac: multigene baculovirus-based eukaryotic protein complex production. *Curr Protoc Protein Sci Chapter 5*, Unit5.20.
- Gallmeier, E., Calhoun, E.S., Rago, C., Brody, J.R., Cunningham, S.C., Hucl, T., Gorospe, M., Kohli, M., Lengauer, C., and Kern, S.E. (2006). Targeted Disruption of FANCC and FANCG in Human Cancer Provides a Preclinical Model for Specific Therapeutic Options. *Gastroenterology* *130*, 2145–2154.
- Koomen, M. (2002). Reduced fertility and hypersensitivity to mitomycin C characterize *Fancg/Xrcc9* null mice. *Hum. Mol. Genet.* *11*, 273–281.
- Nomura, Y., Adachi, N., and Koyama, H. (2007). Human Mus81 and FANCB independently contribute to repair of DNA damage during replication. *Genes Cells* *12*, 1111–1122.
- Scaglione, K.M., Basrur, V., Ashraf, N.S., Konen, J.R., Elenitoba-Johnson, K.S.J., Todi, S.V., and Paulson, H.L. (2013). The Ubiquitin-conjugating Enzyme (E2) Ube2w Ubiquitinates the N Terminus of Substrates. *J. Biol. Chem.* *288*, 18784–18788.
- Tatham, M.H., Plechanovová, A., Jaffray, E.G., Salmen, H., and Hay, R.T. (2013). Ube2W conjugates ubiquitin to  $\alpha$ -amino groups of protein N-termini. *Biochem. J.* *453*, 137–145.
- Wilson, J.B., Johnson, M.A., Stuckert, A.P., Trueman, K.L., May, S., Bryant, P.E., Meyn, R.E., D'Andrea, A.D., and Jones, N.J. (2001). The Chinese hamster FANCG/XRCC9 mutant NM3 fails to express the monoubiquitinated form of the FANCD2 protein, is hypersensitive to a range of DNA damaging agents and exhibits a normal level of spontaneous sister chromatid exchange. *Carcinogenesis* *22*, 1939–1946.
